# Supplementary material for: Definition of Human Apolipoprotein A-I Epitopes Recognized by Autoantibodies Present in Patients with Cardiovascular Diseases
Source: PubMed Central journal article supplement (PMC4192480; doi:10.1074/jbc.m114.589002), 2014-08-28
Supplement: supp_M114.589002_jbc.M114.589002-1.pdf [file supp_M114.589002_jbc.M114.589002-1.pdf]

**Definition of human apolipoprotein A-I epitopes recognized by autoantibodies present in patients with cardiovascular diseases.**

# Supporting Information

**Figure S1. APOA1\_HUMAN protein sequence.**

## ***APOA1\_Human protein sequence***

10 20 30 40 50 60  
MKA AVLTLAV LFLTGSQARH FWQQDEPPQS PWDRVKDLAT VYVDVLKDSG RDYVSQFEGS  
70 80 90 100 110 120  
ALGKQLNLKL LDNWDSVTST FSKLREQ LGP VTQEFWDNLE KETEGLRQEM SKDLEEVKAK  
130 140 150 160 170 180  
VQPYLDDFQK KWQEEMELYR QKVEPLRAEL QEGARQKLHE LQEKLSPLGE EMRDRARAHV  
190 200 210 220 230 240  
DALRTHLAPY SDELQRRLAA RLEALKENGG ARLAEYHAKA TEHLSTLSEK AKPALEDLRQ  
250 260  
GLLPVLESFK VSFLSALEEY TKKLNTQ

### ***Cleavage at Lysine (K) residues***

| mass    | position | peptide sequence                           |
|---------|----------|--------------------------------------------|
| 4824.59 | 165-206  | LSPLGEEMRDRARAHVDALRTHLAPYSDELQRRLAARLEALK |
| 2202.12 | 84-101   | LREQ LGPVTQEFWDNLEK                        |
| 2025.14 | 233-250  | PALEDLRQGLLPVLESFK                         |
| 1815.85 | 48-64    | DSGRDYVSQFEGSALGK                          |
| 1723.94 | 143-157  | VEPLRAELQEGARQK                            |
| 1612.79 | 70-83    | LLDNWDSVTSTFSK                             |
| 1539.73 | 132-142  | WQEEMELYRQK                                |
| 1453.71 | 25-36    | DEPPQSPWDRVK                               |
| 1415.70 | 207-219  | ENGGARLAEYHAK                              |
| 1386.72 | 251-262  | VSFLSALEEYTK                               |
| 1307.63 | 102-112  | ETEGLRQEMSK                                |
| 1252.62 | 121-130  | VQPYLDDFQK                                 |
| 1235.69 | 37-47    | DLATVYVDVLK                                |
| 1215.62 | 220-230  | ATEHLSTLSEK                                |
| 896.48  | 158-164  | LHELQEK                                    |
| 732.38  | 113-118  | DLEEVK                                     |
| 615.38  | 65-69    | QLNLK                                      |

### ***Cleavage at Arginine (R) residues***

| mass    | position | peptide sequence                   |
|---------|----------|------------------------------------|
| 4161.03 | 108-140  | QEMSKDLEEVKAKVQPYLDDFQKKWQEEMELYR  |
| 3859.99 | 52-85    | DYVSQFEGSALGKQLNLKLLDNWDSVTSTFSKLR |
| 3182.73 | 240-267  | QGLLPVLESFKVSFLSALEEYTKKLNTQ       |
| 3021.60 | 213-239  | LAEYHAKATEHLSTLSEKAKPALEDLR        |
| 2618.27 | 86-107   | EQLGPVTQEFWDNLEKETEGLR             |
| 2165.14 | 156-173  | QKLHELQEKLSPLGEMR                  |
| 1878.03 | 35-51    | VKDLATVYVDVLKDSGR                  |
| 1301.65 | 185-195  | THLAPYSDEL R                       |
| 1226.54 | 25-34    | DEPPQSPWDR                         |
| 1157.63 | 202-212  | LEALKENGGAR                        |
| 873.44  | 148-155  | AELQEGAR                           |
| 869.52  | 141-147  | QKVEPLR                            |
| 781.43  | 178-184  | AHVDALR                            |

**Figure S1. APOA1\_HUMAN protein sequence.** Human ApoA-I protein sequence (APOA1\_HUMAN / P02647) and peptides derived from the cleavage at lysine or arginine residues.

**Figure S2. Human ApoA-I fractionation.**

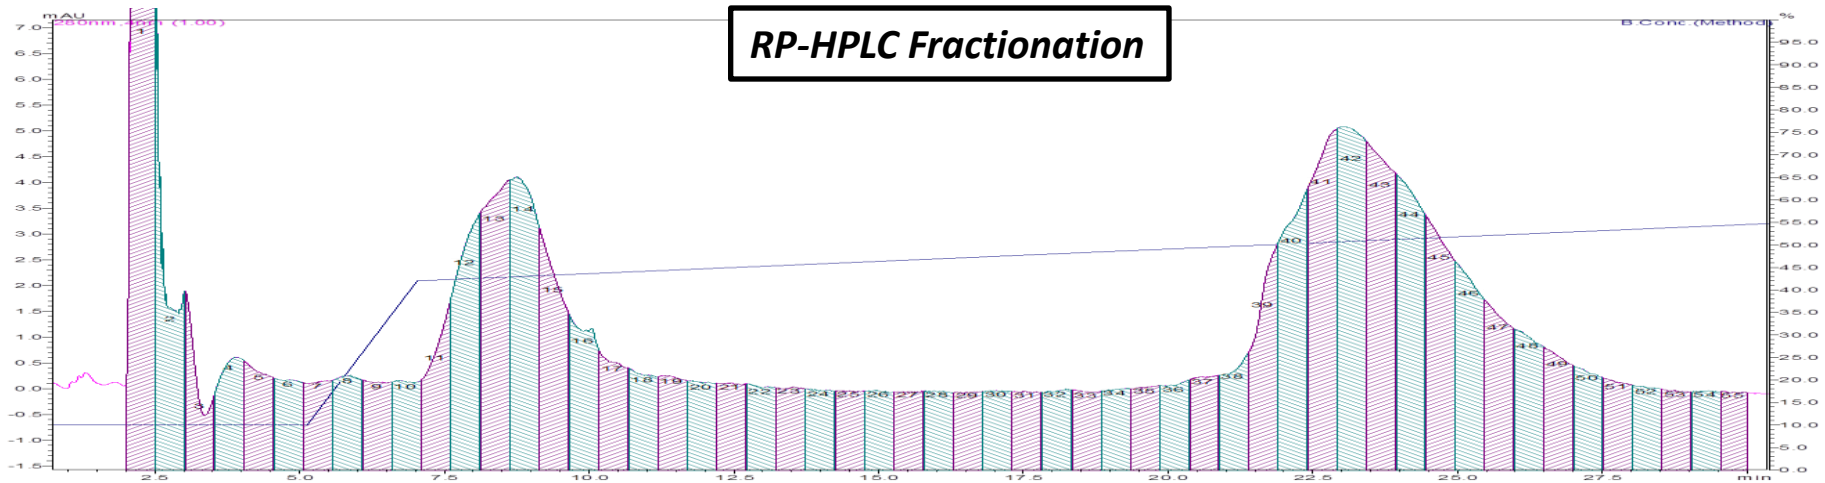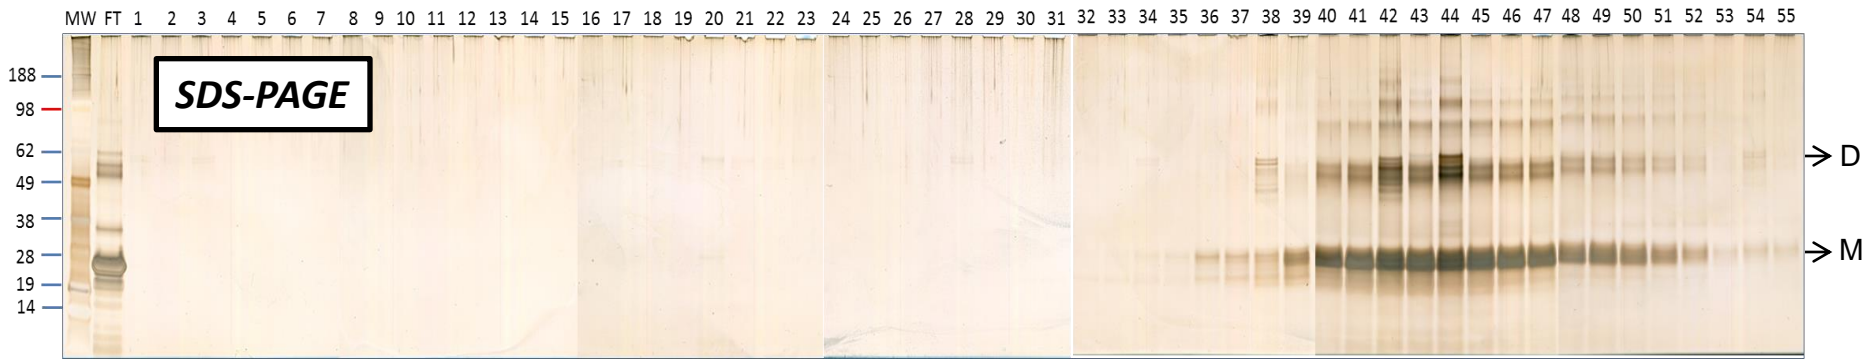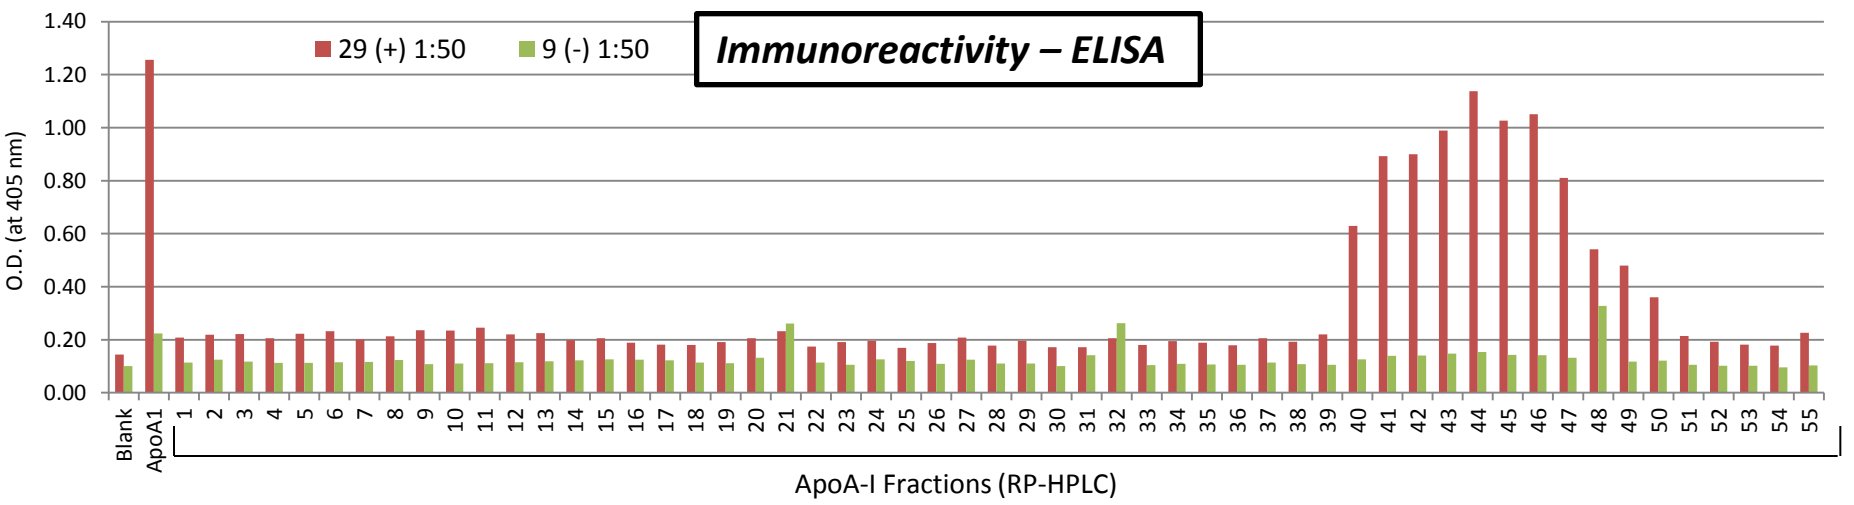

**Figure S2. Human ApoA-I fractionation.**

**A.** Chromatogram of full length human ApoA-I separation by reversed-phase high-performance liquid chromatography, emphasizing the collected fractions.

**B.** Electrophoresis (SDS-PAGE, silver-staining) of each individual fraction collected during the ApoA-I fractionation (D: dimer, M: monomer).

**C.** Immunoreactivity of autoantibodies from positive and negative patient sera against peptides present in each collected fraction.

**Figure S3. Information about the sequencing and MS/MS spectra of the peptide A and B obtained by ApoA-I digestion at lysine residues.**

# A. MS/MS - Fraction 70/71: m/z 966.13 (5+); RT: 36.20 min – Peptide A

ApoA1LysCnewfrct71 #1506 RT: 36.20 AV: 1 NL: 2.38E5  
 T: FTMS + p NSI d Full ms2 966.13@cid35.00 [255.00-2000.00]

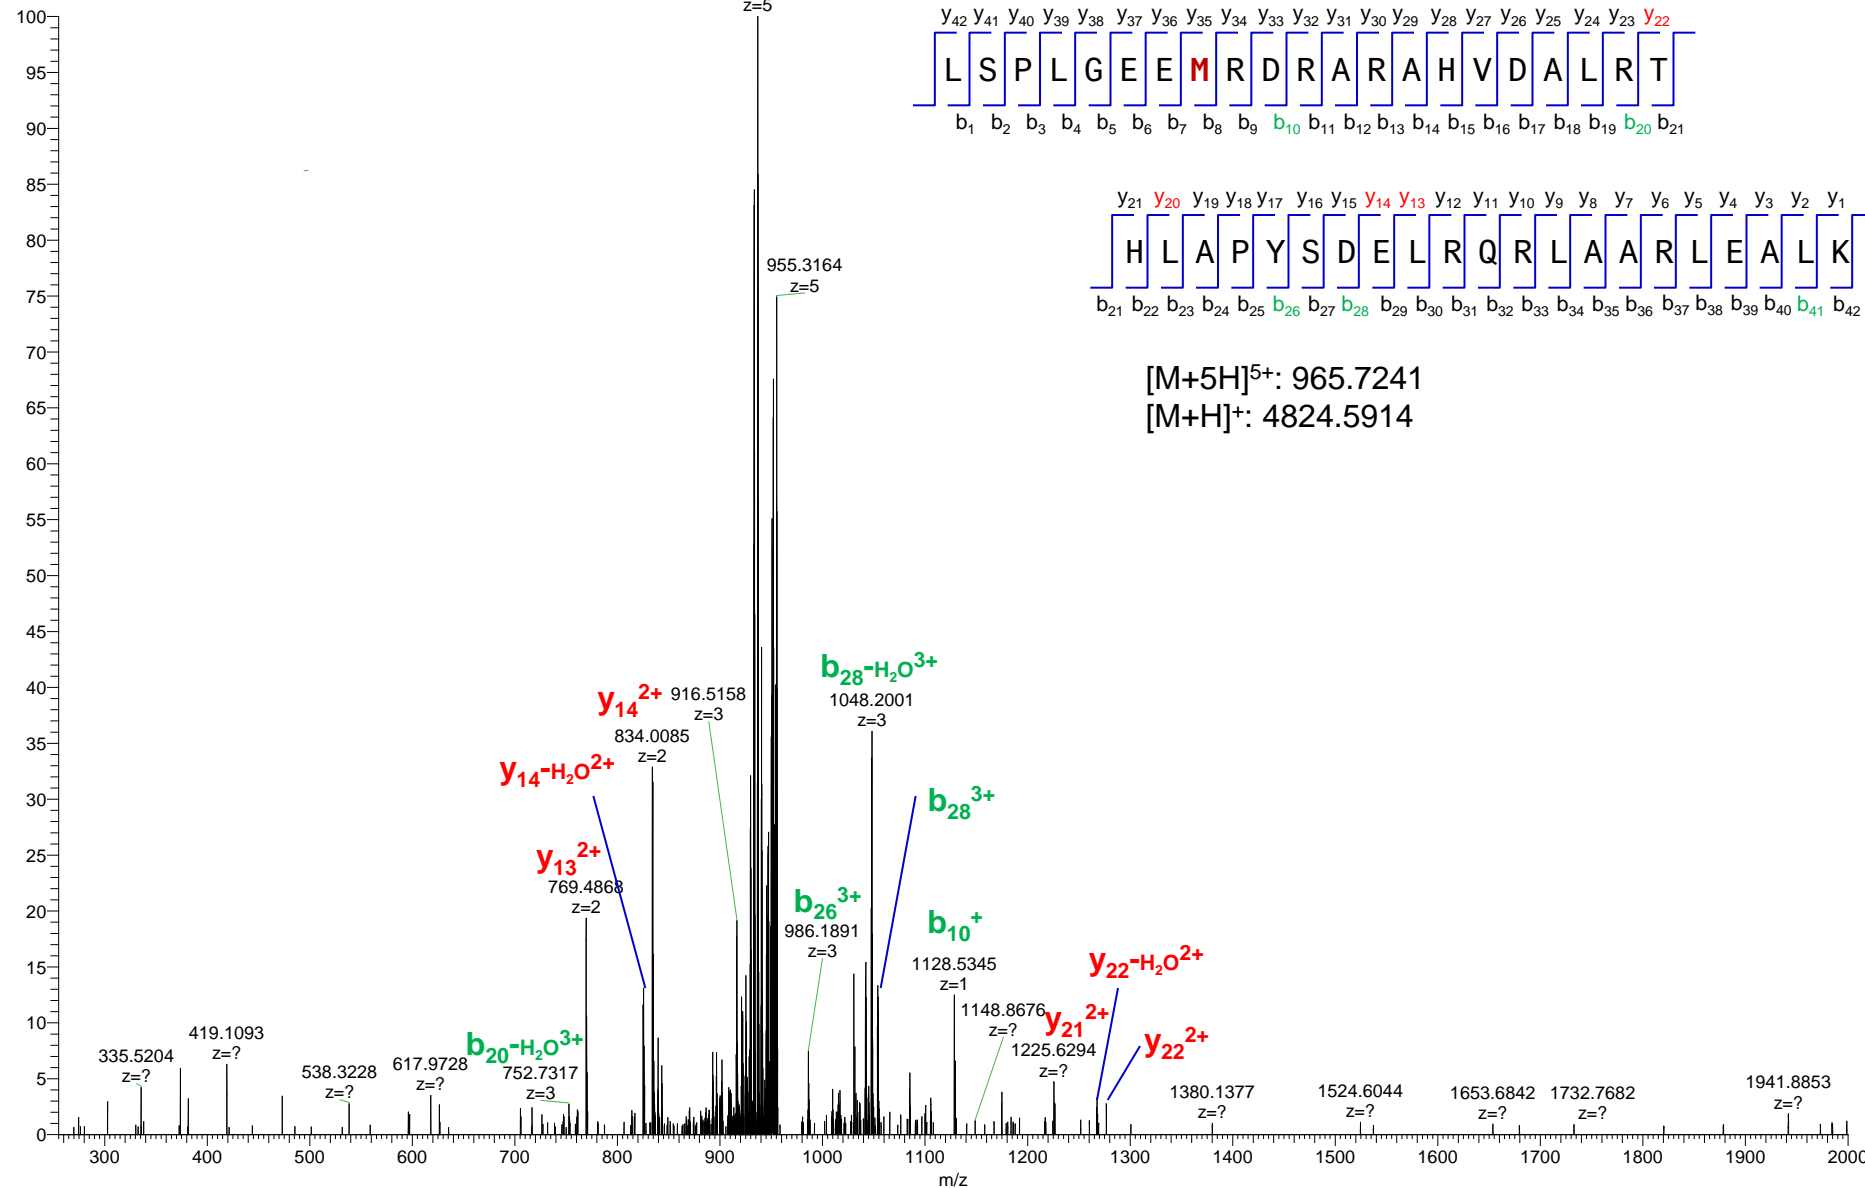



# B. MS/MS - Fraction 70/71: m/z 969.32 (5+); RT: 33.69 min – Peptide B

ApoA1LysCnewfrct70 #1433 RT: 33.69 AV: 1 NL: 6.46E4  
 T: FTMS + p NSI d Full ms2 969.32@cid35.00 [255.00-2000.00]

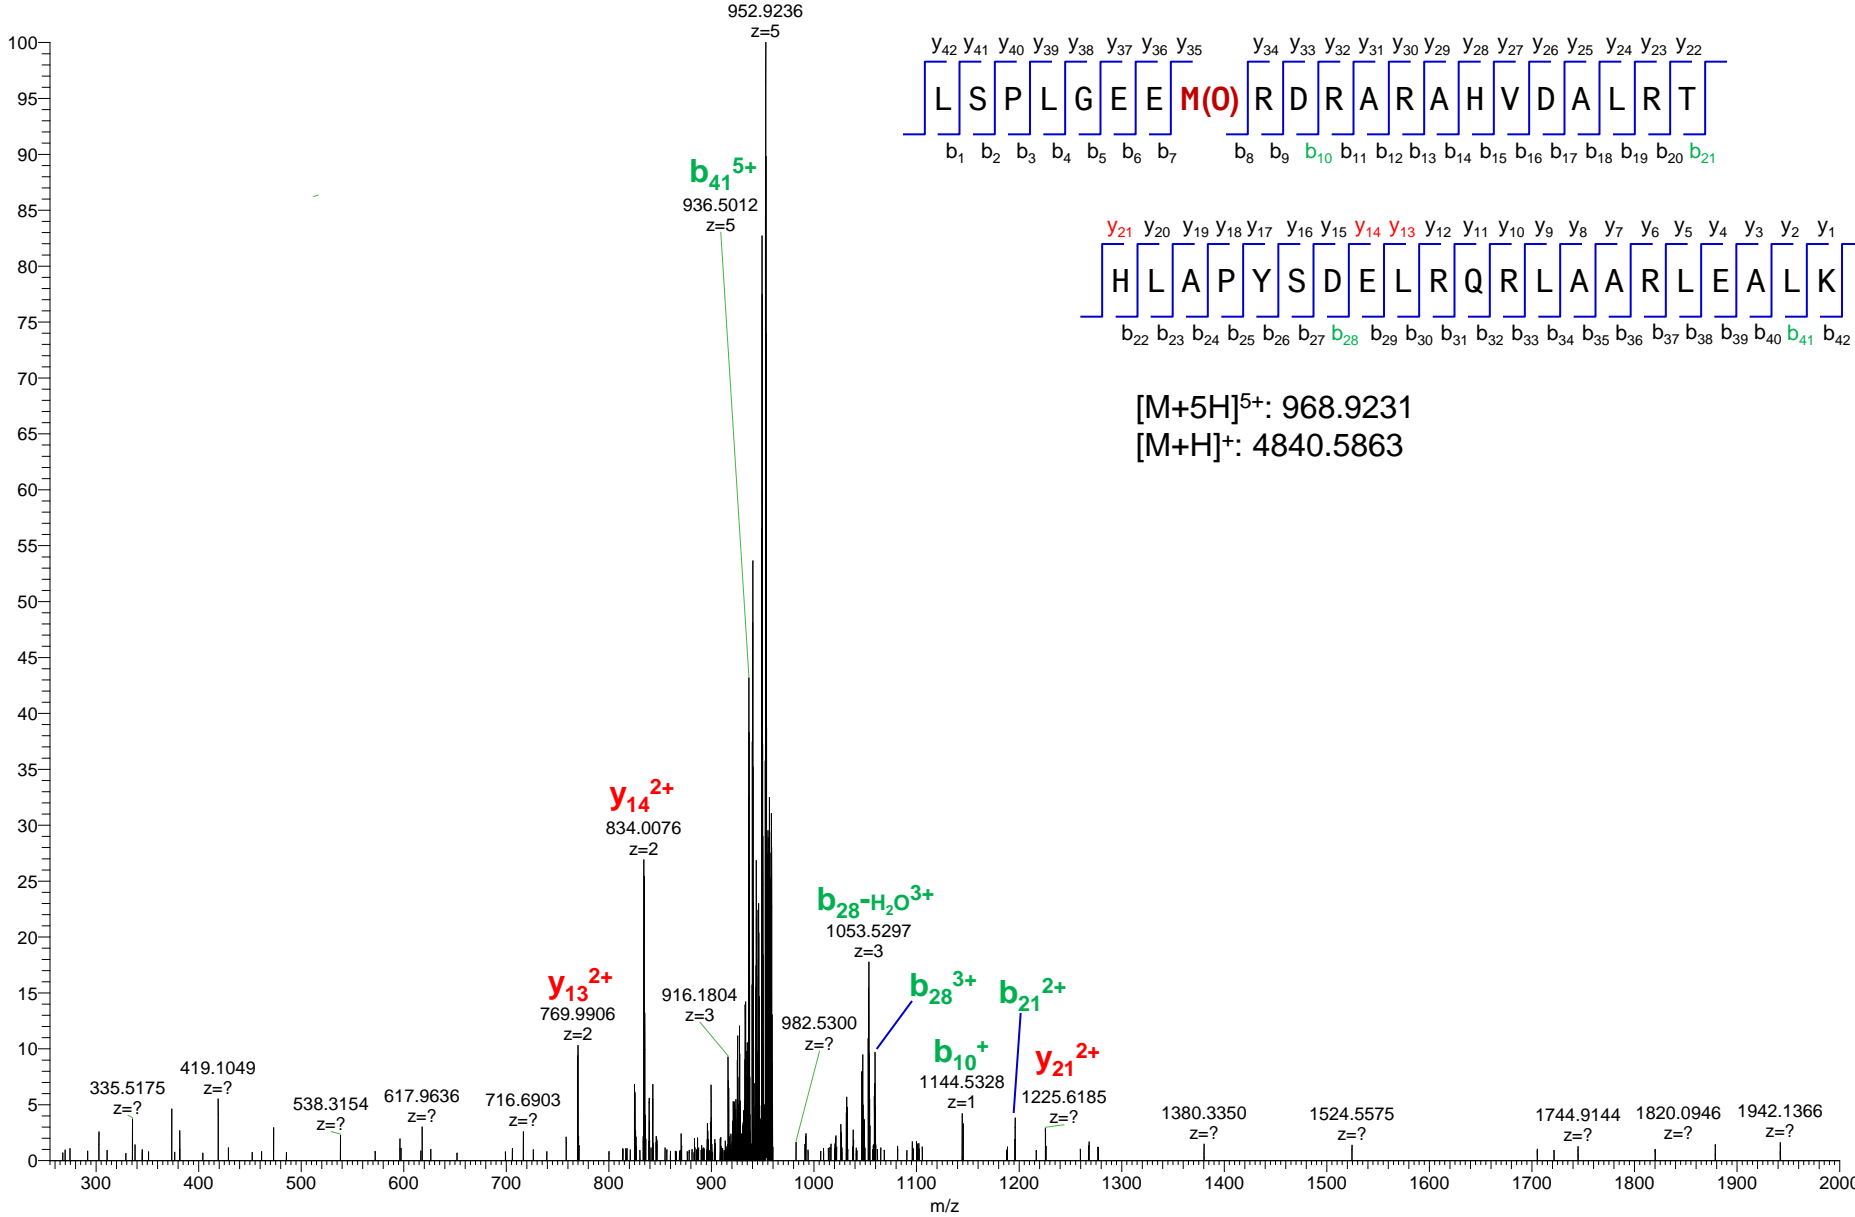

[M+5H]<sup>5+</sup>: 968.9231  
 [M+H]<sup>+</sup>: 4840.5863

**C.** Extracted Ion Chromatogram of the peptides A and B in isolated fractions from ApoA-I digested at lysine residues.

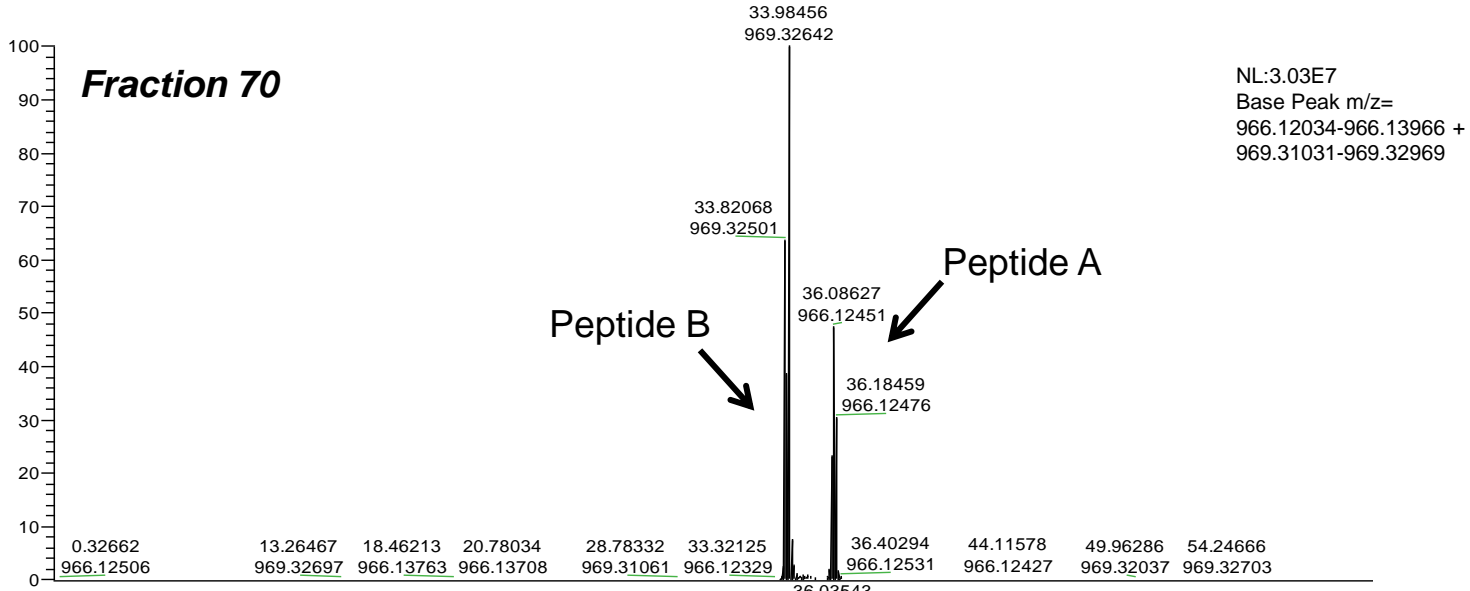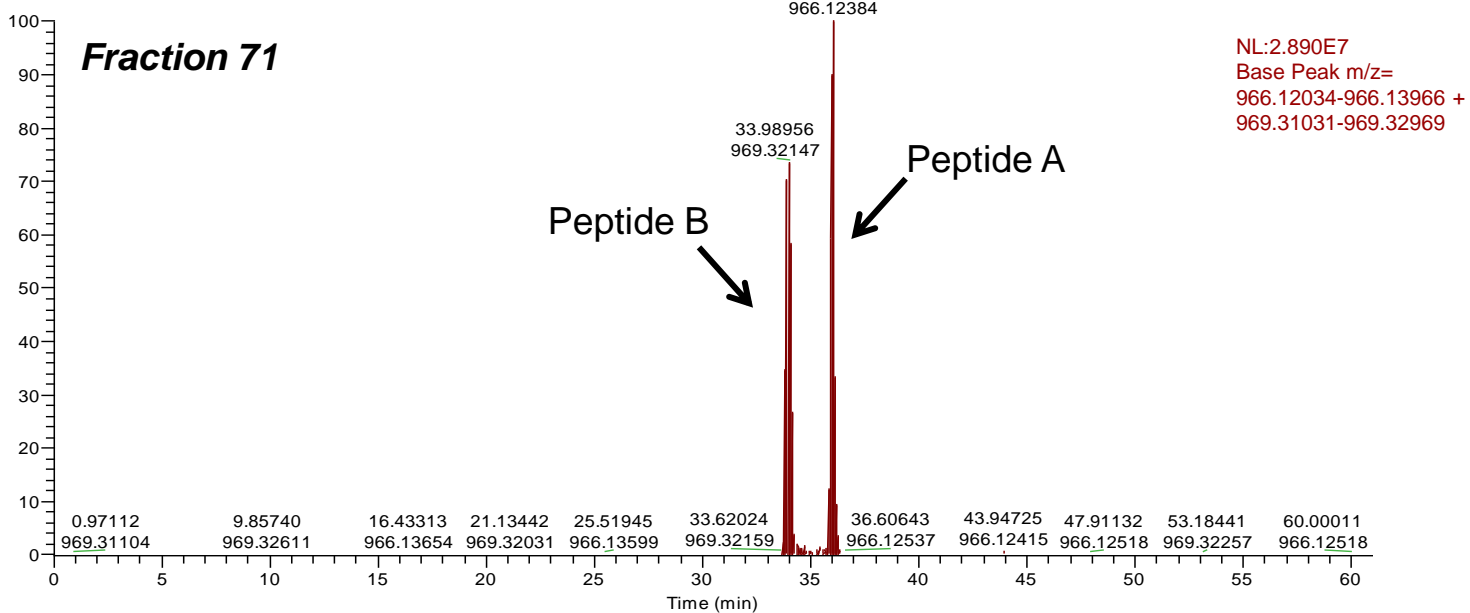

**Figure S3. Information about the sequencing and MS/MS spectra of the peptide A and B obtained by ApoA-I digestion at lysine residues.**

**A.** Representative MS/MS spectra of the peptide A present in the fractions 70 and 71: aa165-206 – LSPLGEEMRDRARAHVDALRTHLAPYSDELQRRLAARLEALK.

**B.** Representative MS/MS spectra of the peptide A present in the fractions 70 and 71: aa165-206 – LSPLGEEM\*RDRARAHVDALRTHLAPYSDELQRRLAARLEALK; \*Oxidized methionine.

**C.** Extracted ion chromatogram of the peptides A and B.

**Figure S4. ApoA-I epitope identification using digestion at arginine (R) residues.**

**A.** Full chromatograms (nano-LC) of isolated fractions from ApoA-I digested at arginine (R) residues (Part 1)

RT: 0.00 - 118.00

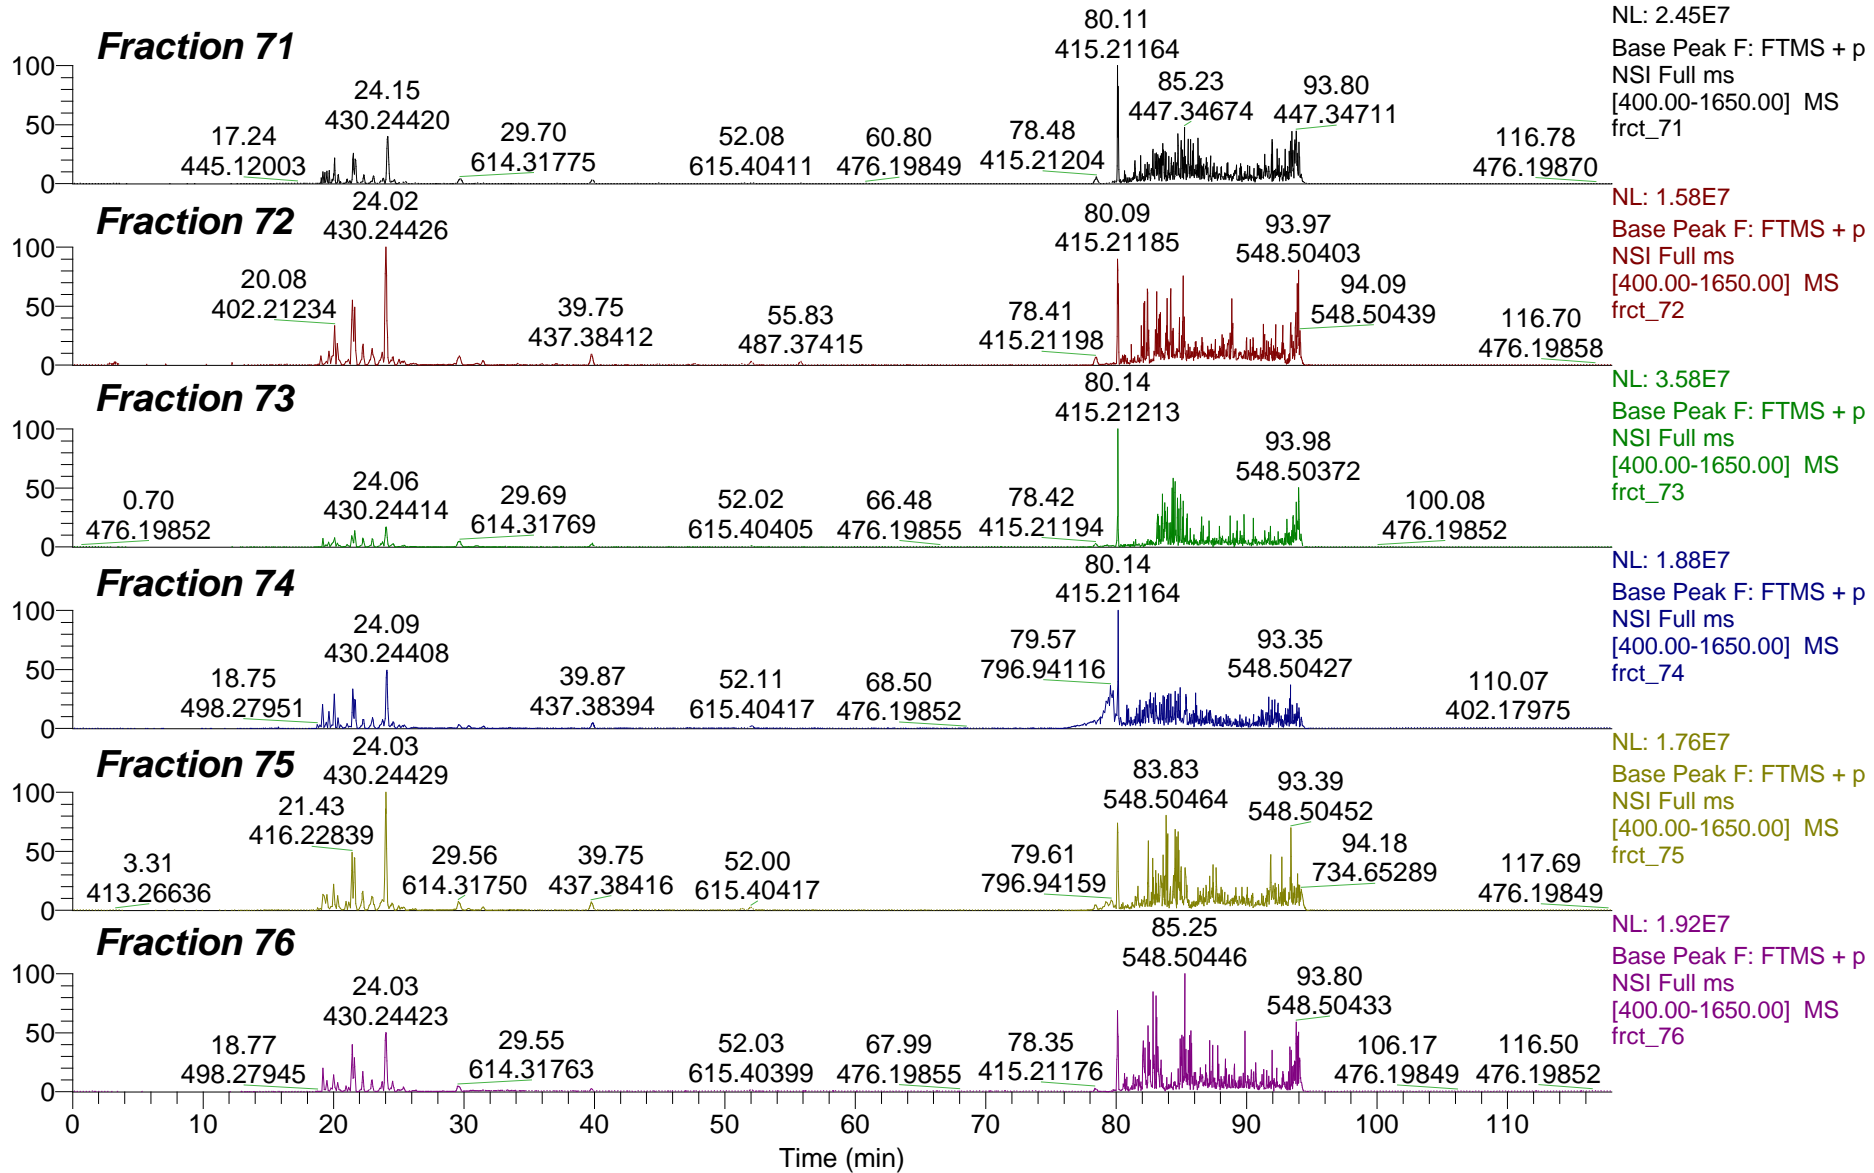

**A.** Full chromatograms (nano-LC) of isolated fractions from ApoA-I digested at arginine (R) residues (Part 2)

RT: 0.00 - 118.00

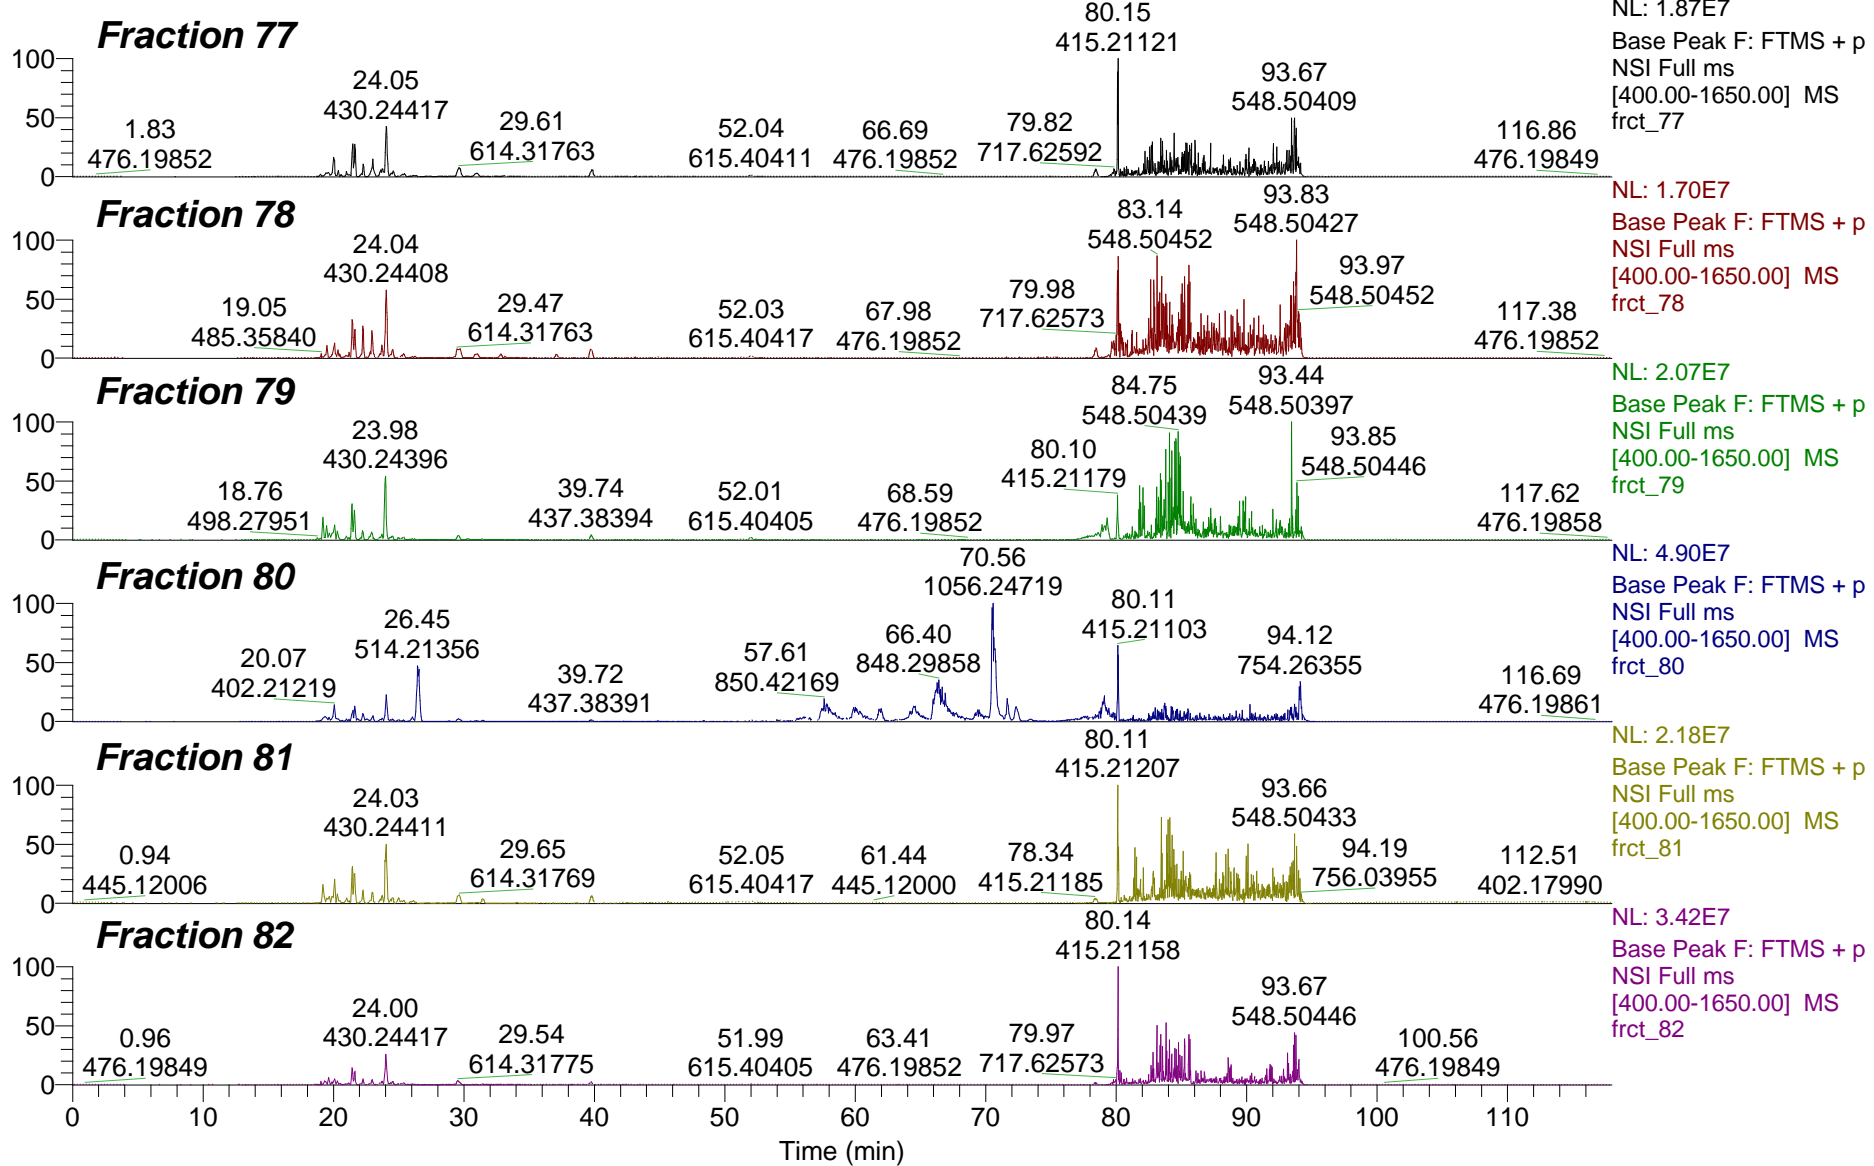

**A.** Full chromatograms (nano-LC) of isolated fractions from ApoA-I digested at arginine (R) residues (Part 3)

RT: 0.00 - 118.00

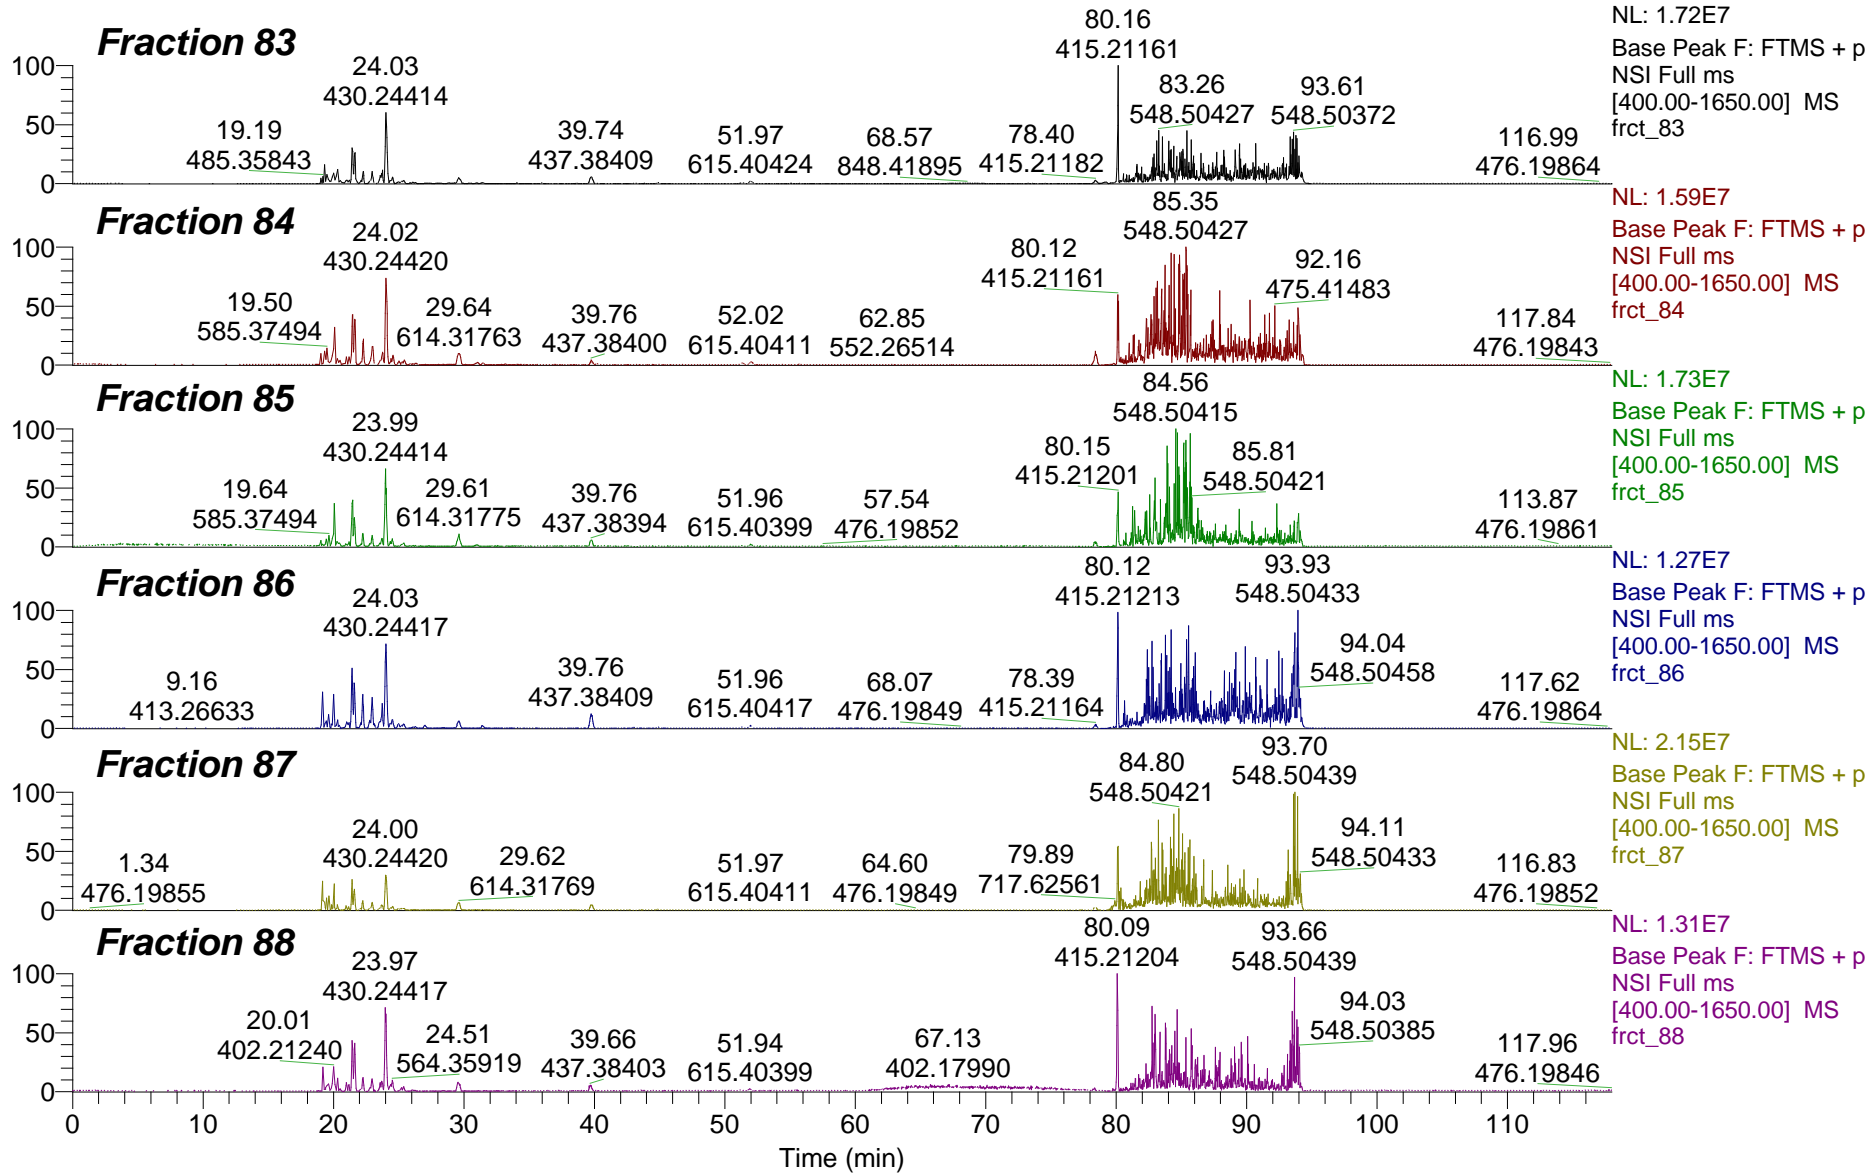

# B. MS/MS - Fraction 74: 796.94 (4+); RT: 79.42 min (Parte 1)

frct\_74 #2815 RT: 79.42 AV: 1 NL: 1.04E6  
T: FTMS + p NSI d Full ms2 796.94@cid35.00 [205.00-2000.00]

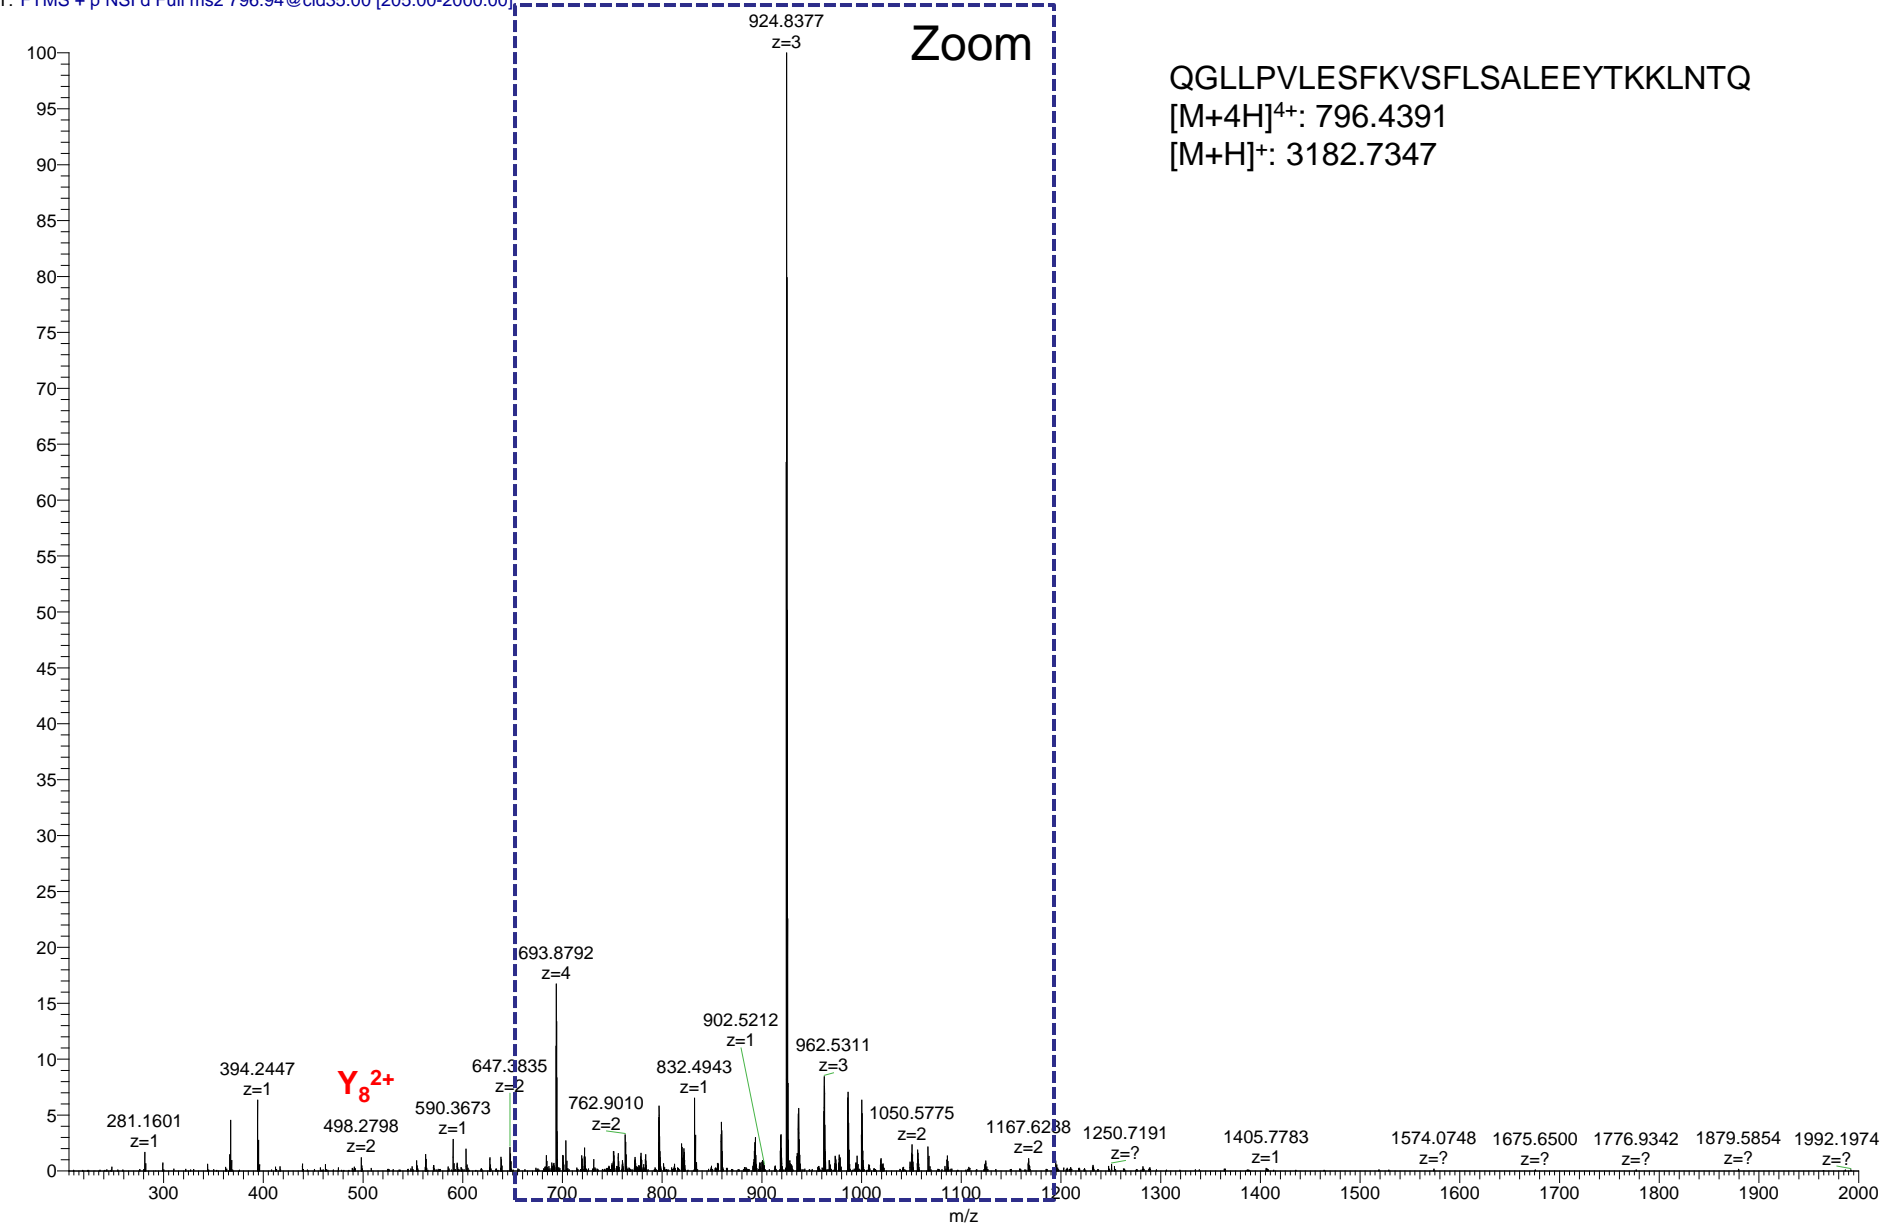



# B. MS/MS - Fraction 74: 796.94 (4+); RT: 79.42 min (Parte 2 - ZOOM)

frct\_74 #2815 RT: 79.42 AV: 1 NL: 1.04E6  
 T: FTMS + p NSI d Full ms2 796.94@cid35.00 [205.00-2000.00]

## ZOOM

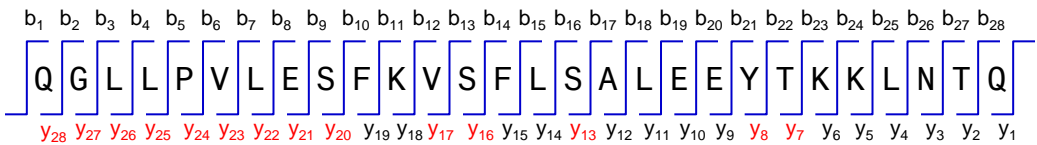

[M+4H]<sup>4+</sup>: 796.4391  
 [M+H]<sup>+</sup>: 3182.7347

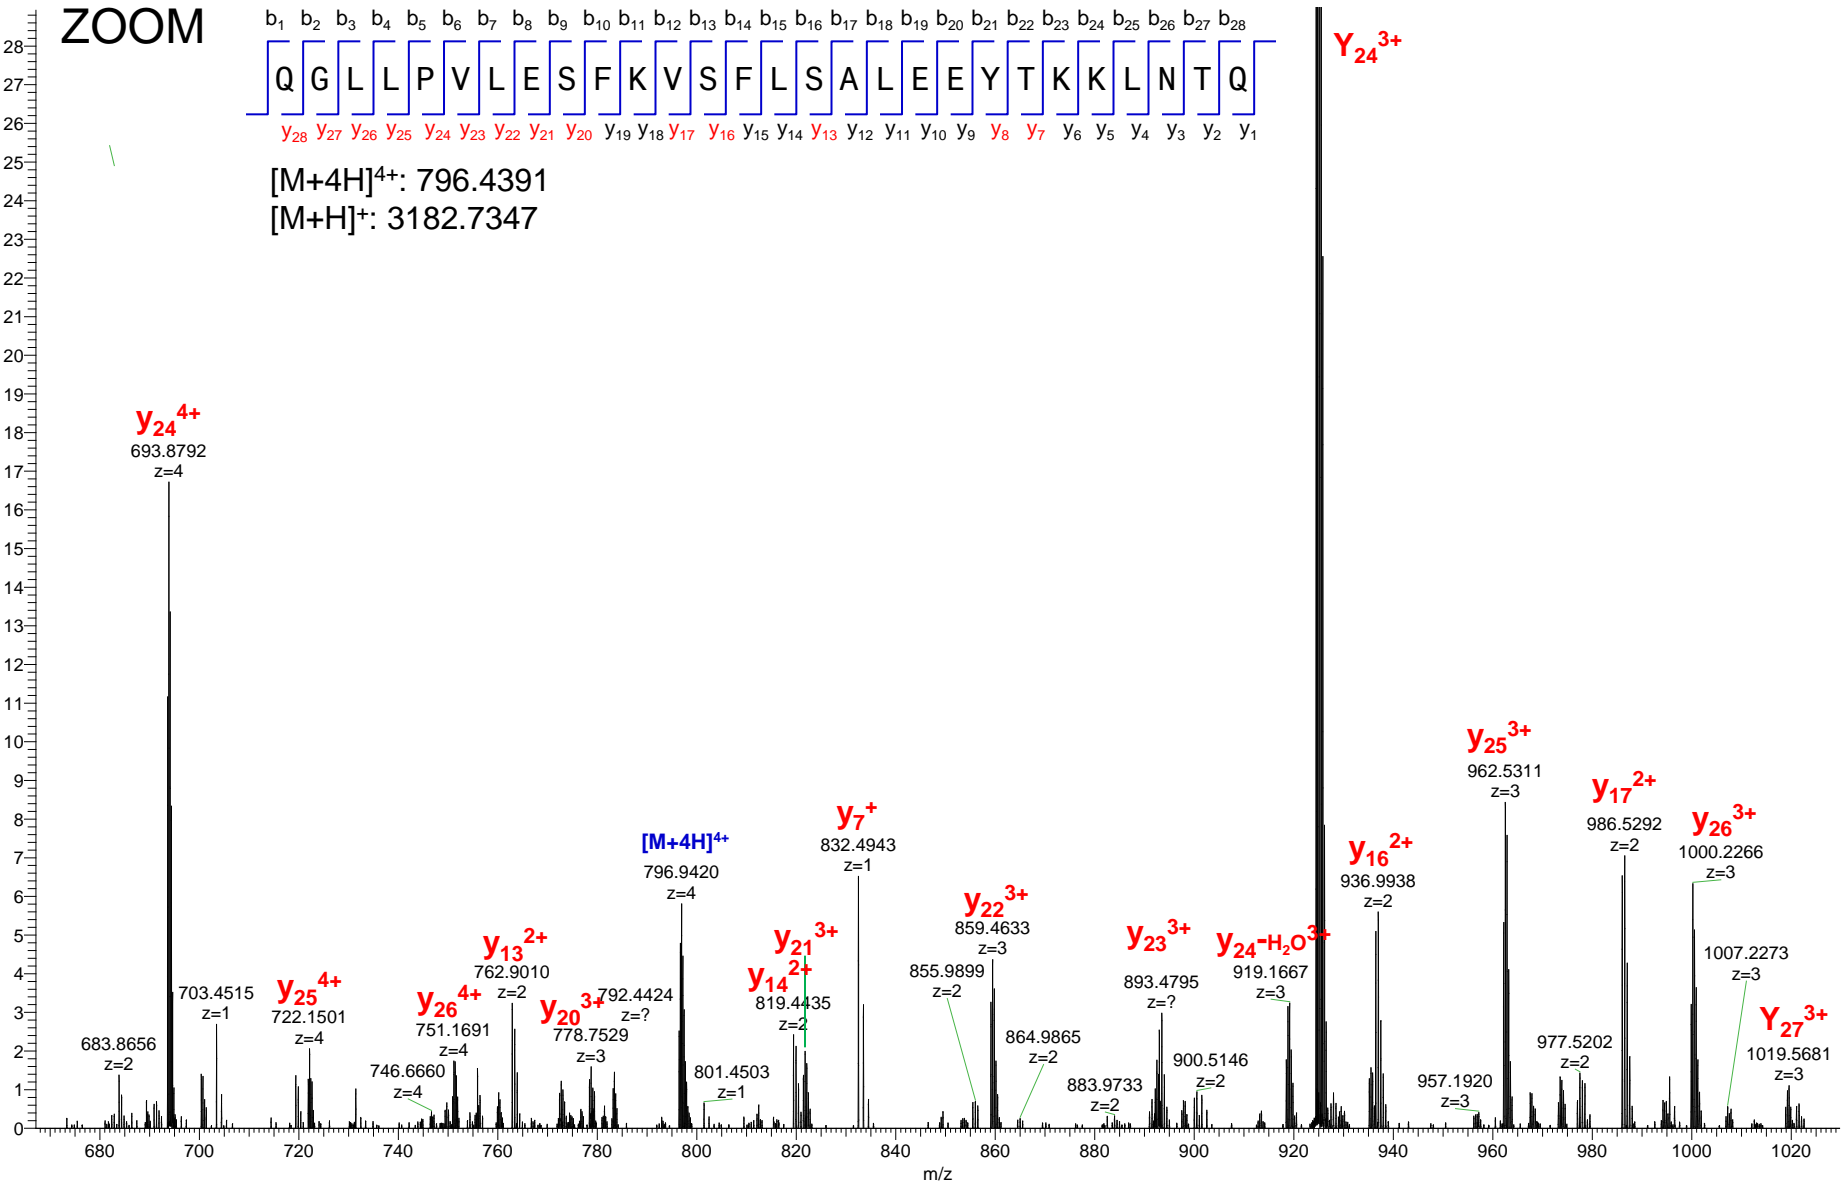



# D. MS - Fraction 80 (RT: 61.70)

frct\_80 #2467 RT: 61.70 AV: 1 NL: 1.92E6  
 T: FTMS + p NSI Full ms [400.00-1650.00]

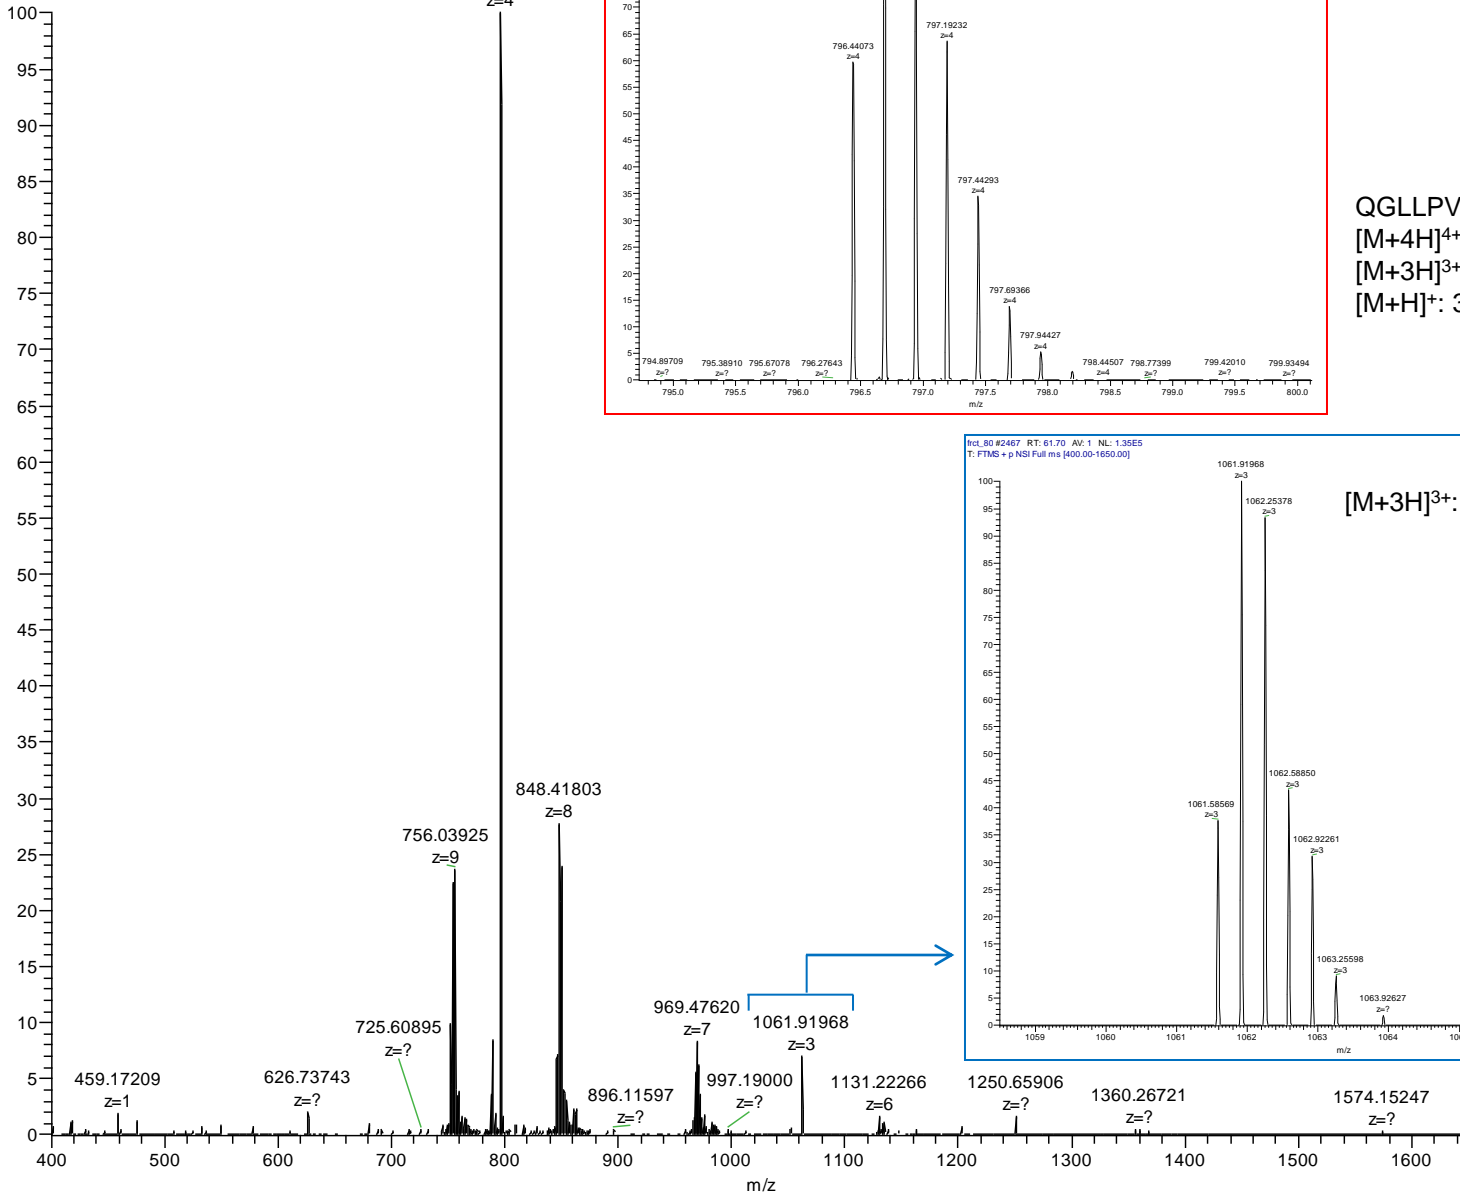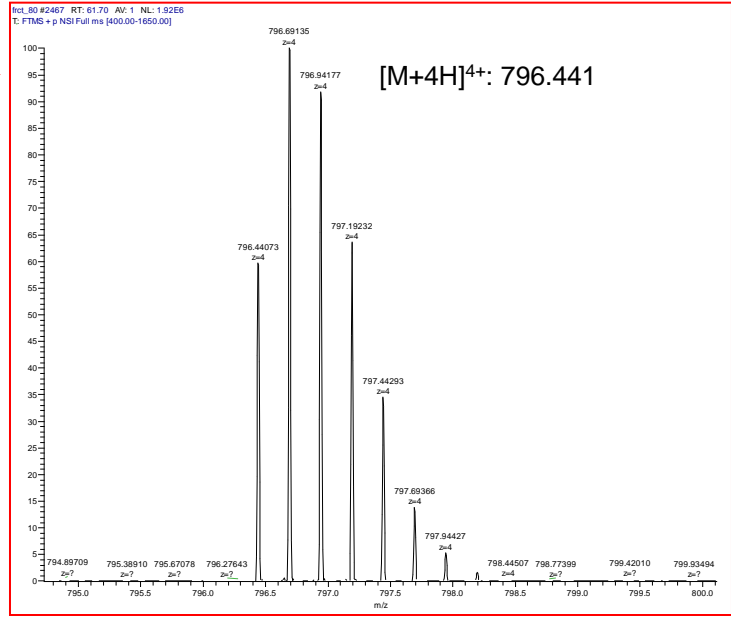

**QGLLPVLESFKVSFLSALEEYTKKLNLTQ**  
**[M+4H]<sup>4+</sup>: 796.441**  
**[M+3H]<sup>3+</sup>: 1061.586**  
**[M+H]<sup>+</sup>: 3182.662**

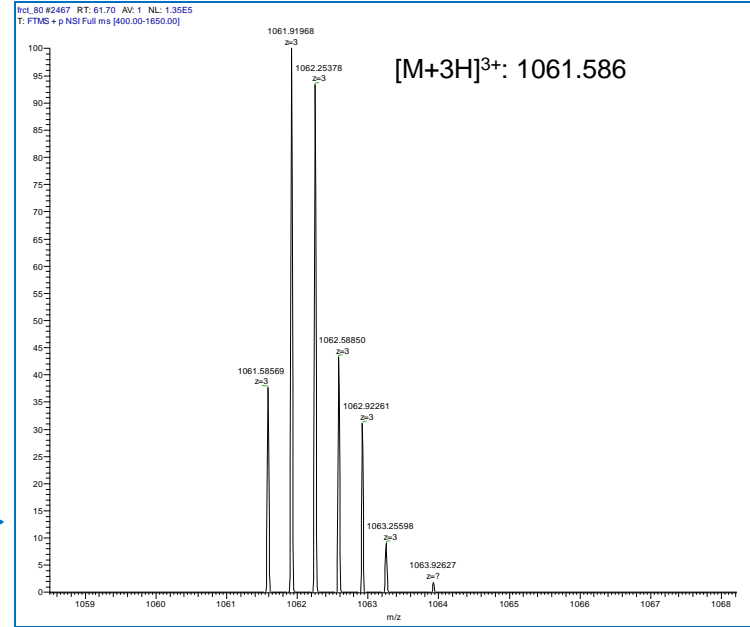

# E. MS/MS - Fraction 80: m/z 796.69 (4+); RT: 61.76 min (Parte 1)

frct\_80 #2470 RT: 61.76 AV: 1 NL: 1.03E6  
T: FTMS + p NSI d Full ms2 796.69@cid35.00 [205.00-2000.00]

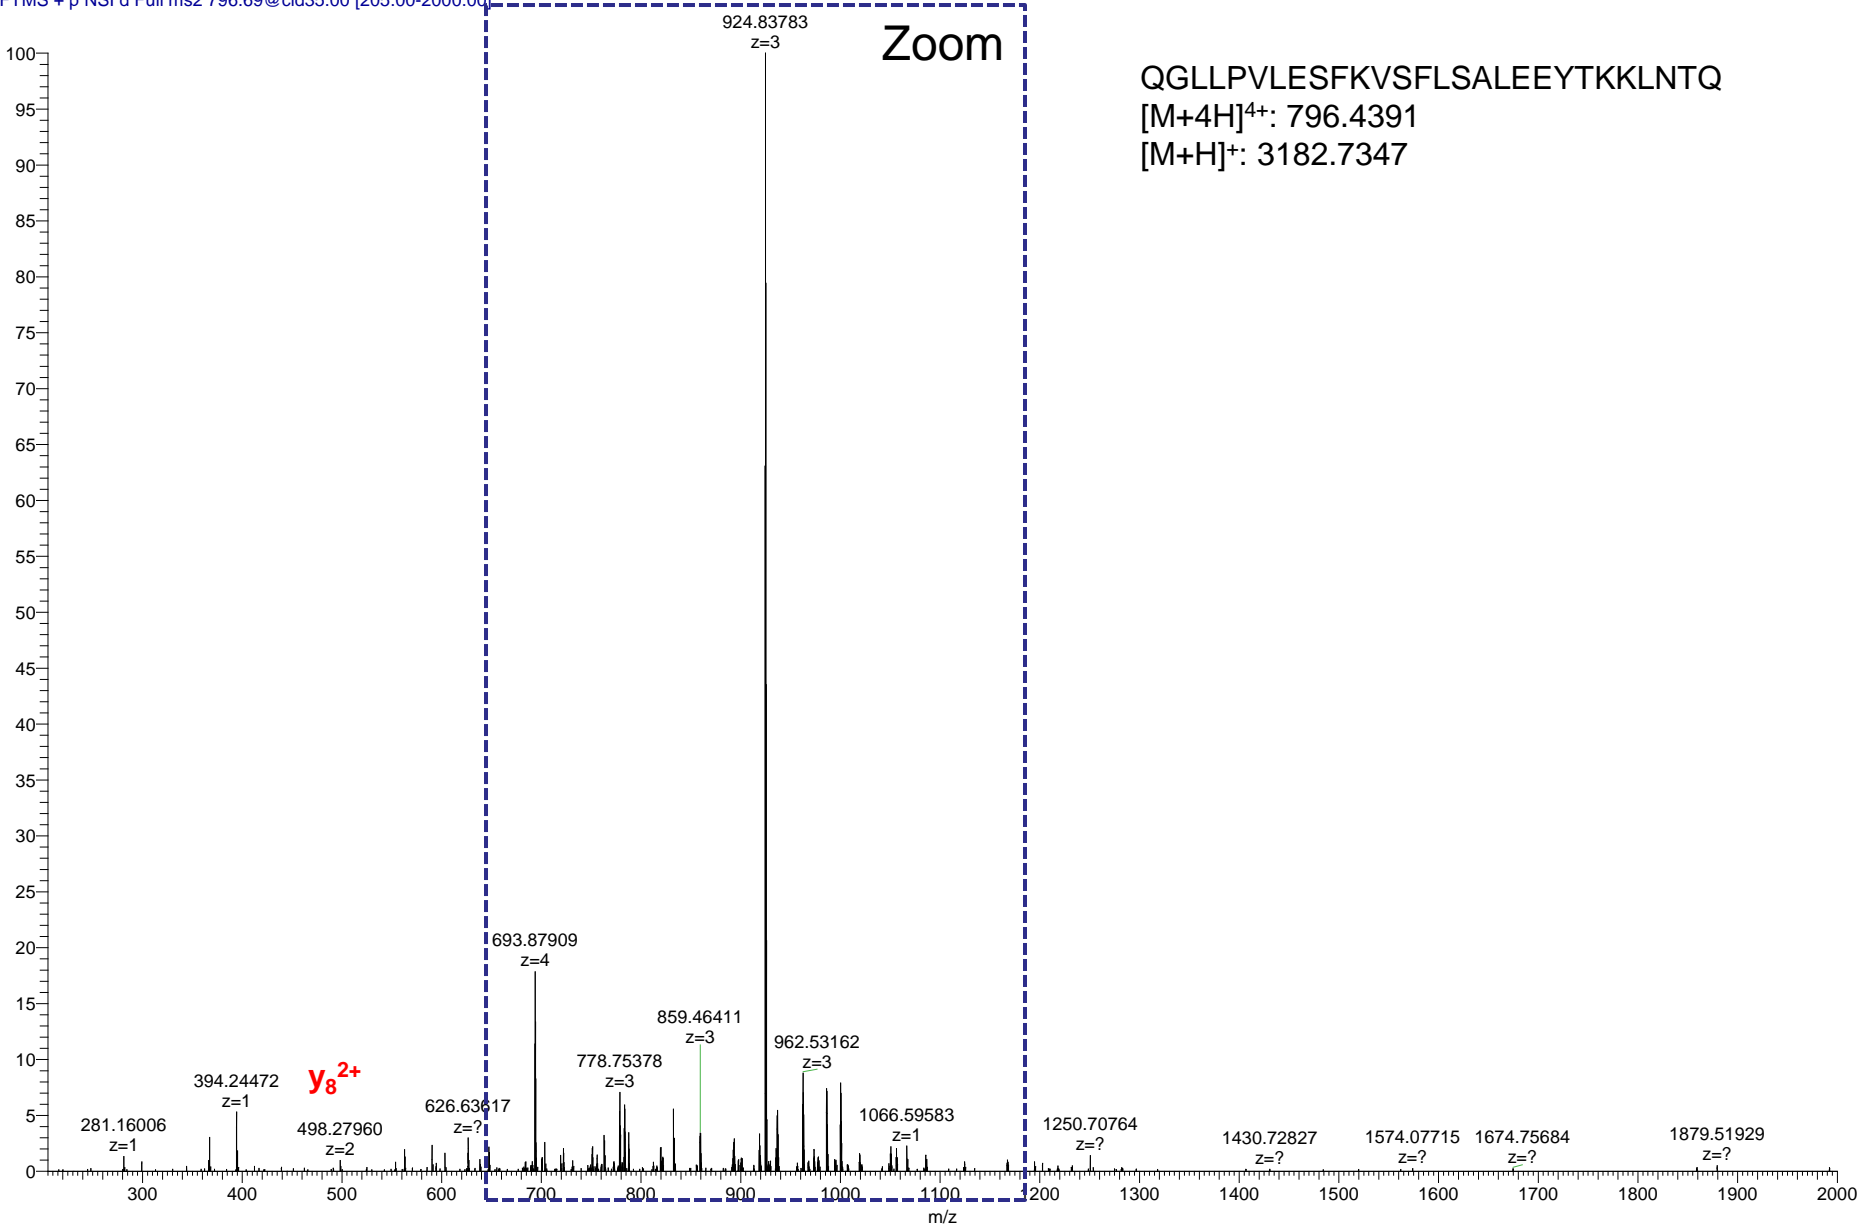

# E. MS/MS - Fraction 80: m/z 796.69 (4+); RT: 61.76 min (Parte 2) (ZOOM)

frct\_80 #2470 RT: 61.76 AV: 1 NL: 1.03E6  
 T: FTMS + p NSI d Full ms2 796.69@cid35.00 [205.00-2000.00]

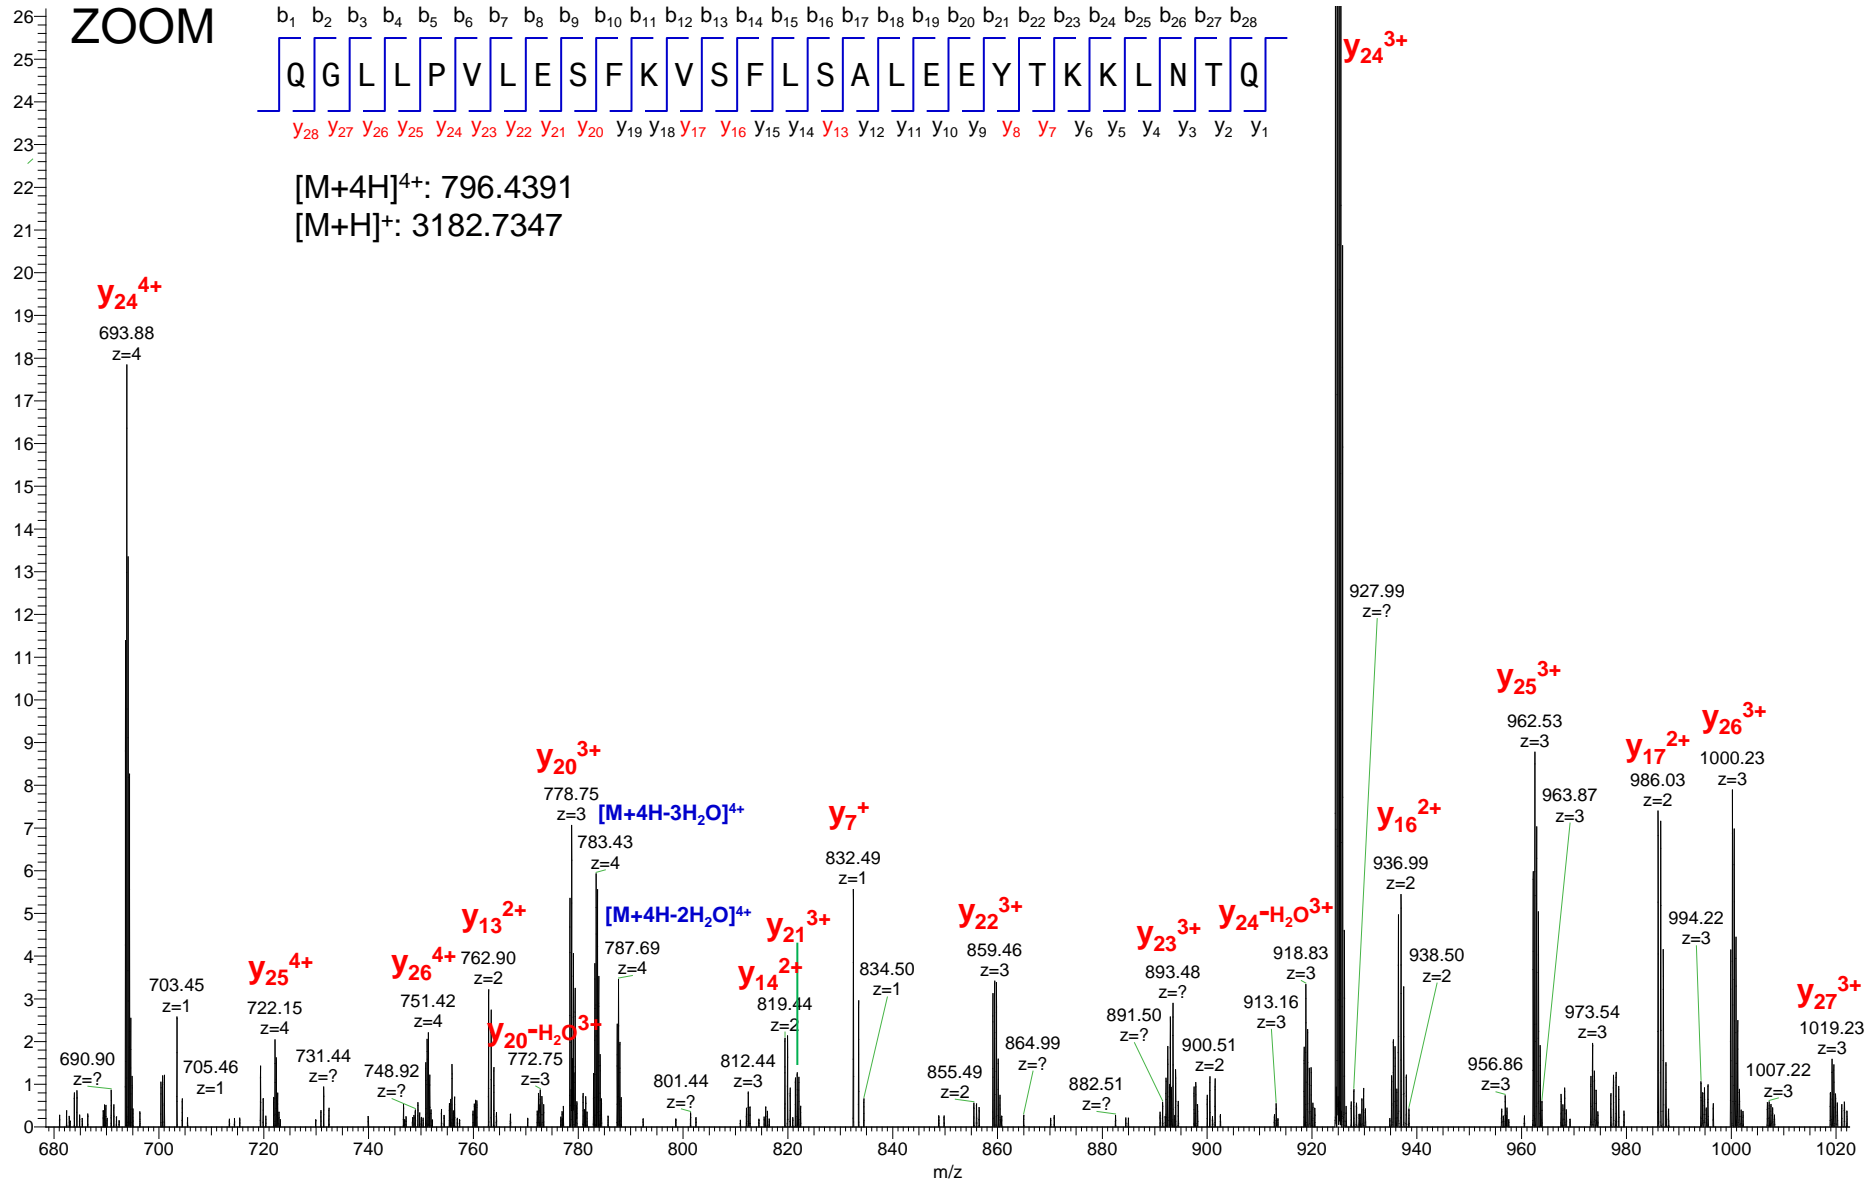

# F. MS - Fraction 80 (RT: 70.65)

frct\_80 #2878 RT: 70.65 Av: 1 NL: 2.98E7  
 T: FTMS + p NSI Full ms [400.00-1650.00]

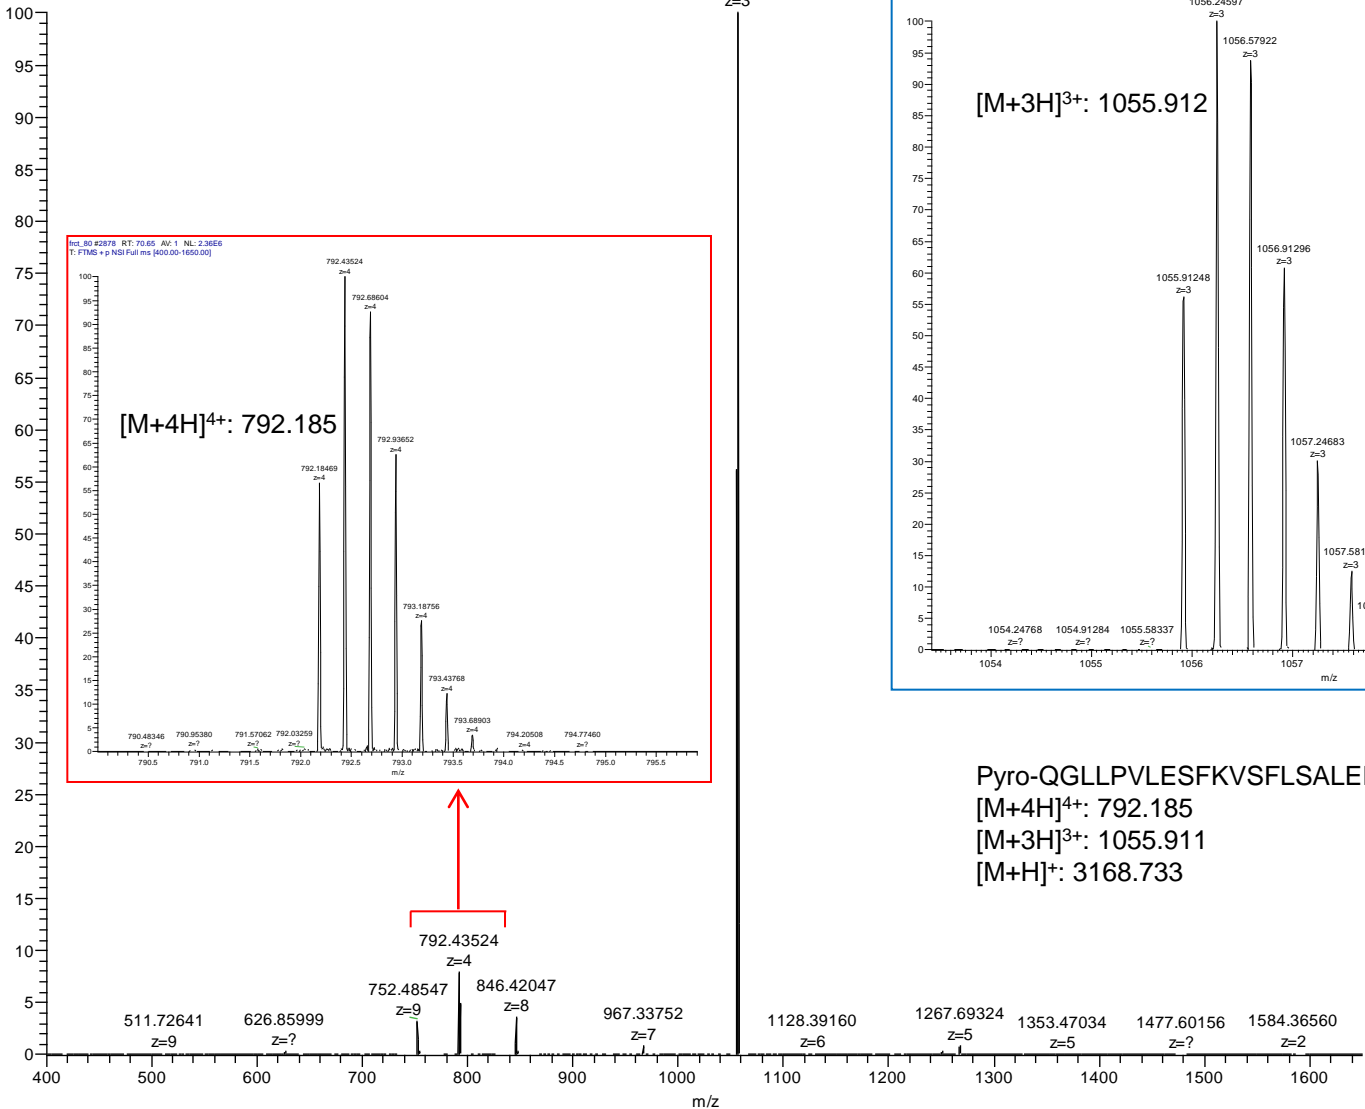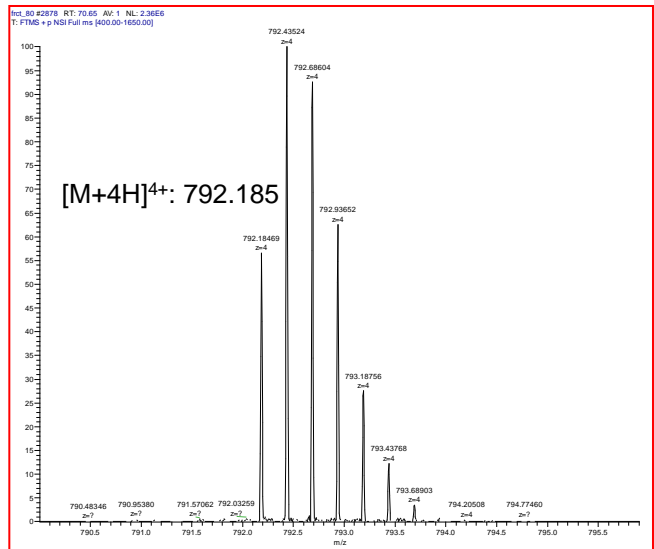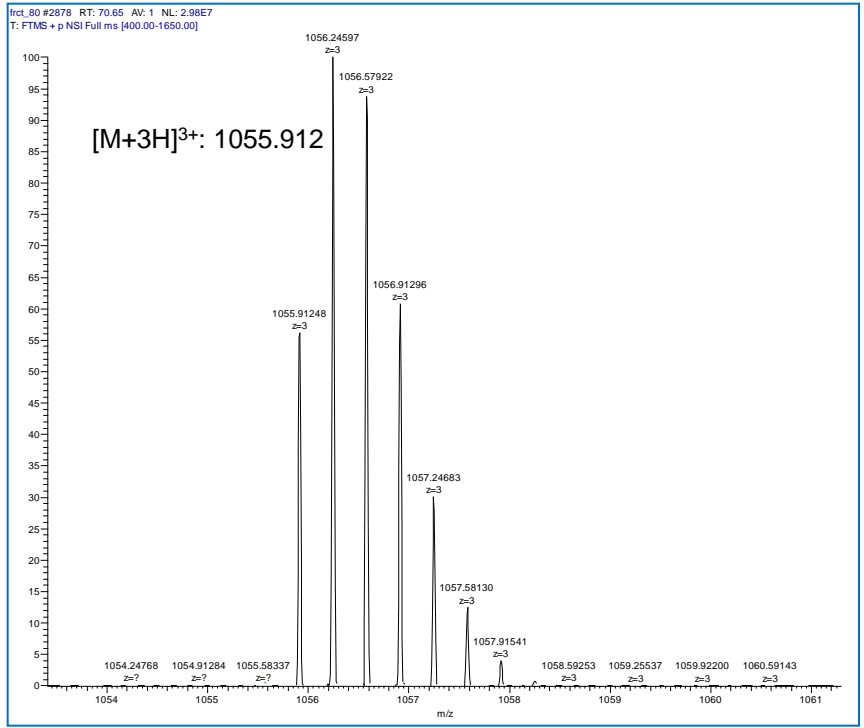

Pyro-QGLLPVLESFKVSFLSALEEYTKKLNTQ  
 [M+4H]<sup>4+</sup>: 792.185  
 [M+3H]<sup>3+</sup>: 1055.911  
 [M+H]<sup>+</sup>: 3168.733

# G. MS/MS - Fraction 80: m/z 1056.24 (3+); RT:70.57 min

frct\_80 #2874 RT: 70.57 AV: 1 NL: 1.20E7  
 T: FTMS + p NSI d Full ms2 1056.24@cid35.00 [280.00-2000.00]

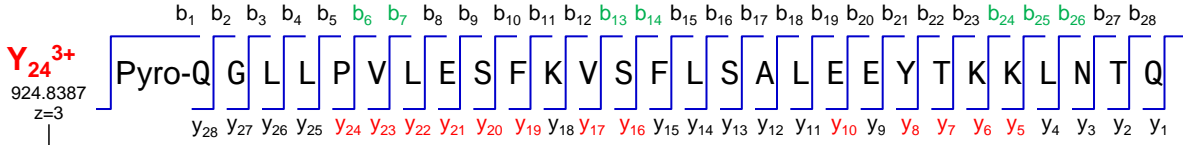

[M+3H]<sup>3+</sup>: 1055.9076  
 [M+H]<sup>+</sup>: 3165.7082

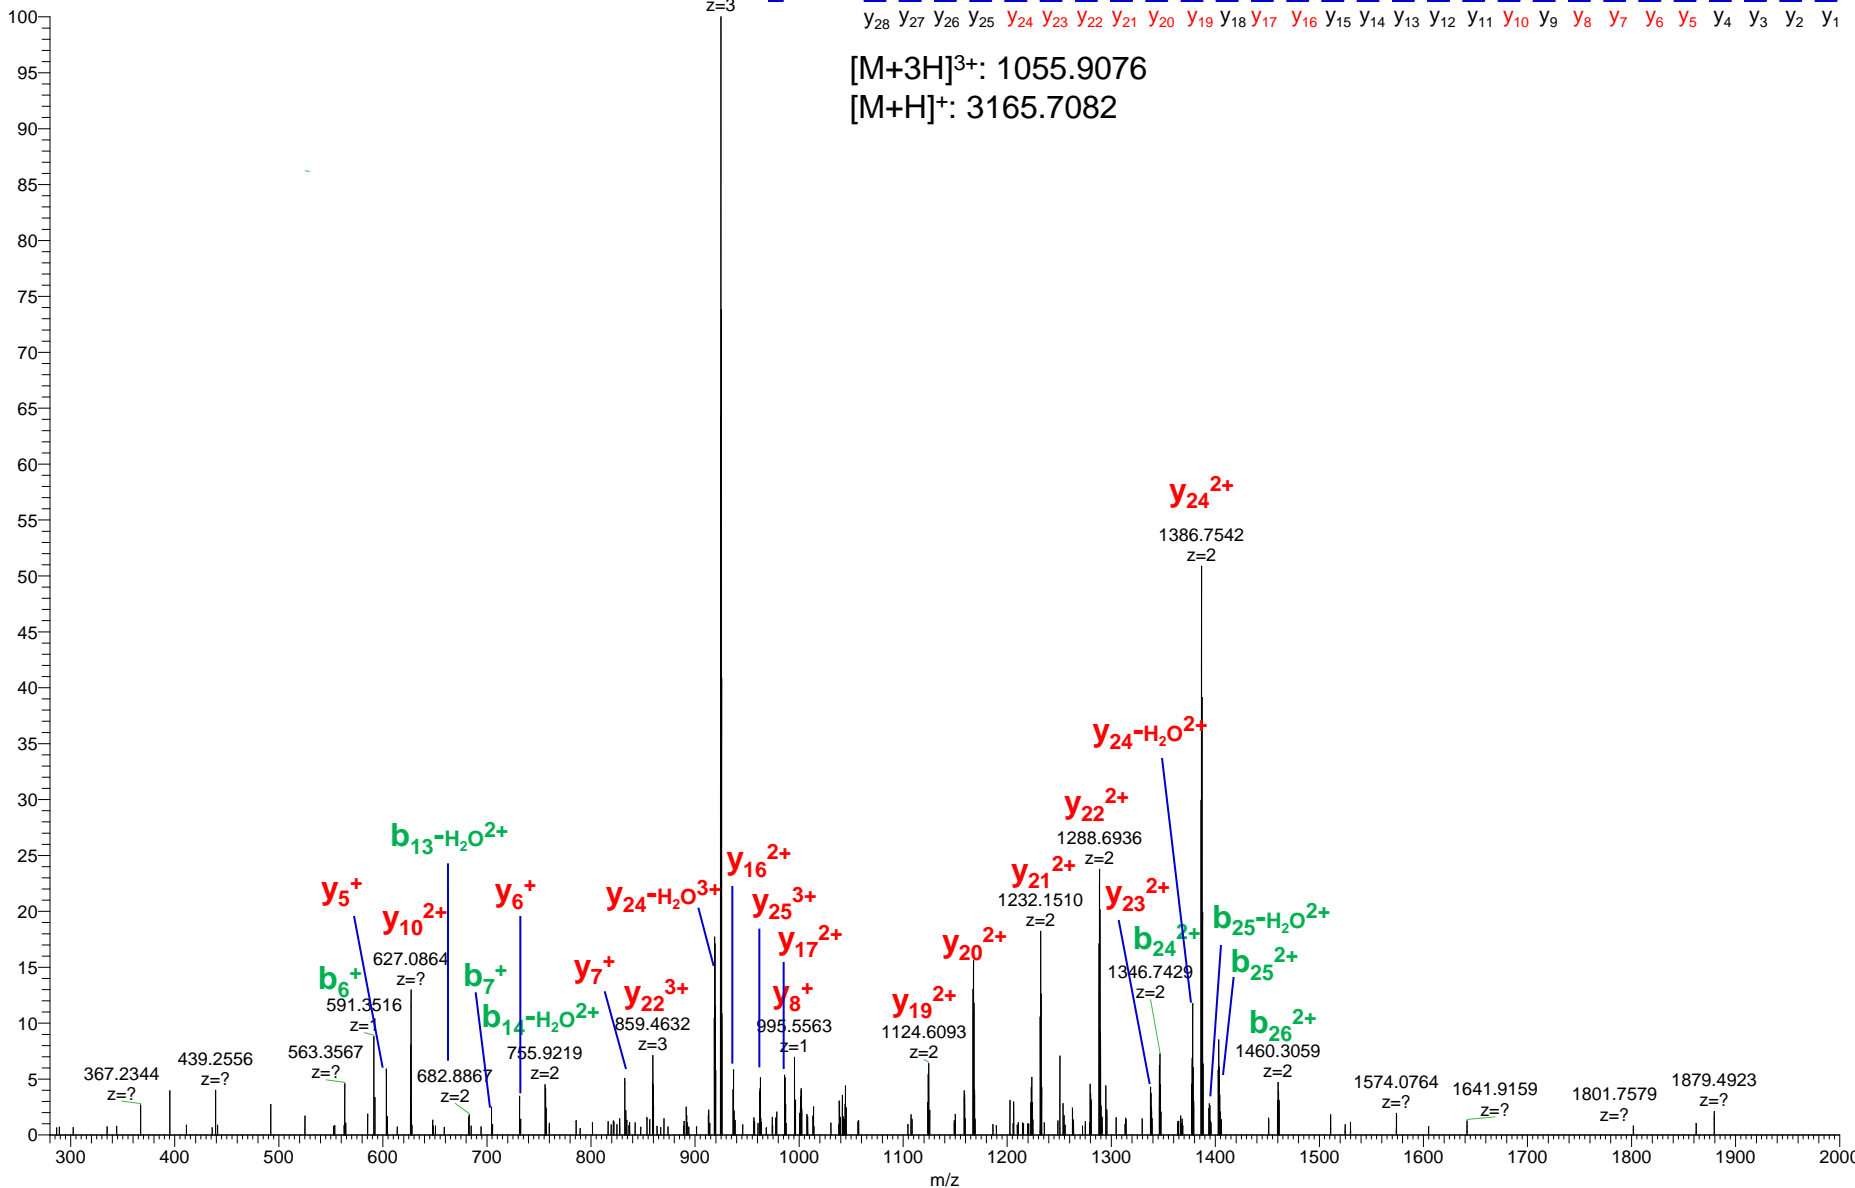

**H.** Extracted Ion Chromatogram of the peptide with m/z= 792.44 in of isolated fractions from ApoA-I digested at arginine (R) residues (Part 1)

RT: 0.00 - 118.00

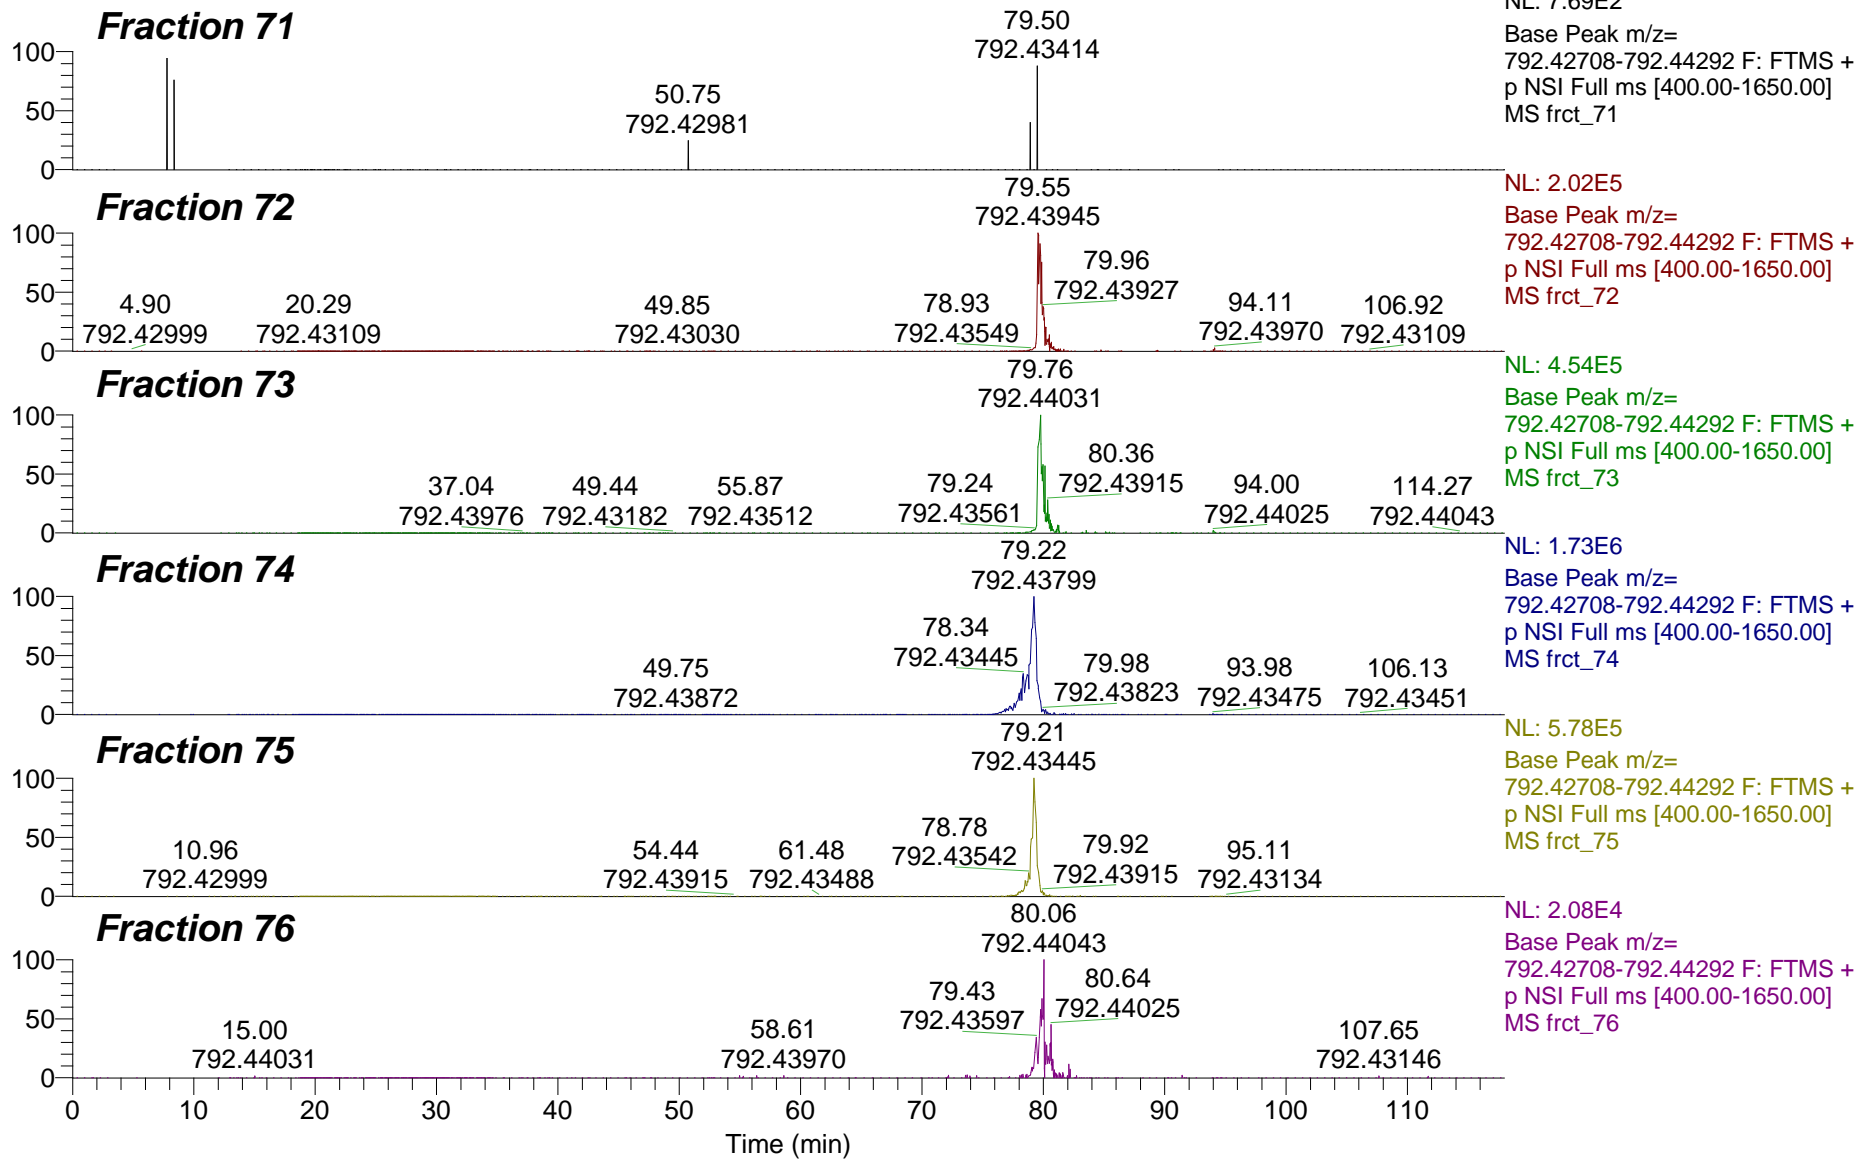



**H.** Extracted Ion Chromatogram of the peptide with m/z= 792.44 in of isolated fractions from ApoA-I digested at arginine (R) residues (Part 2)

RT: 0.00 - 118.00

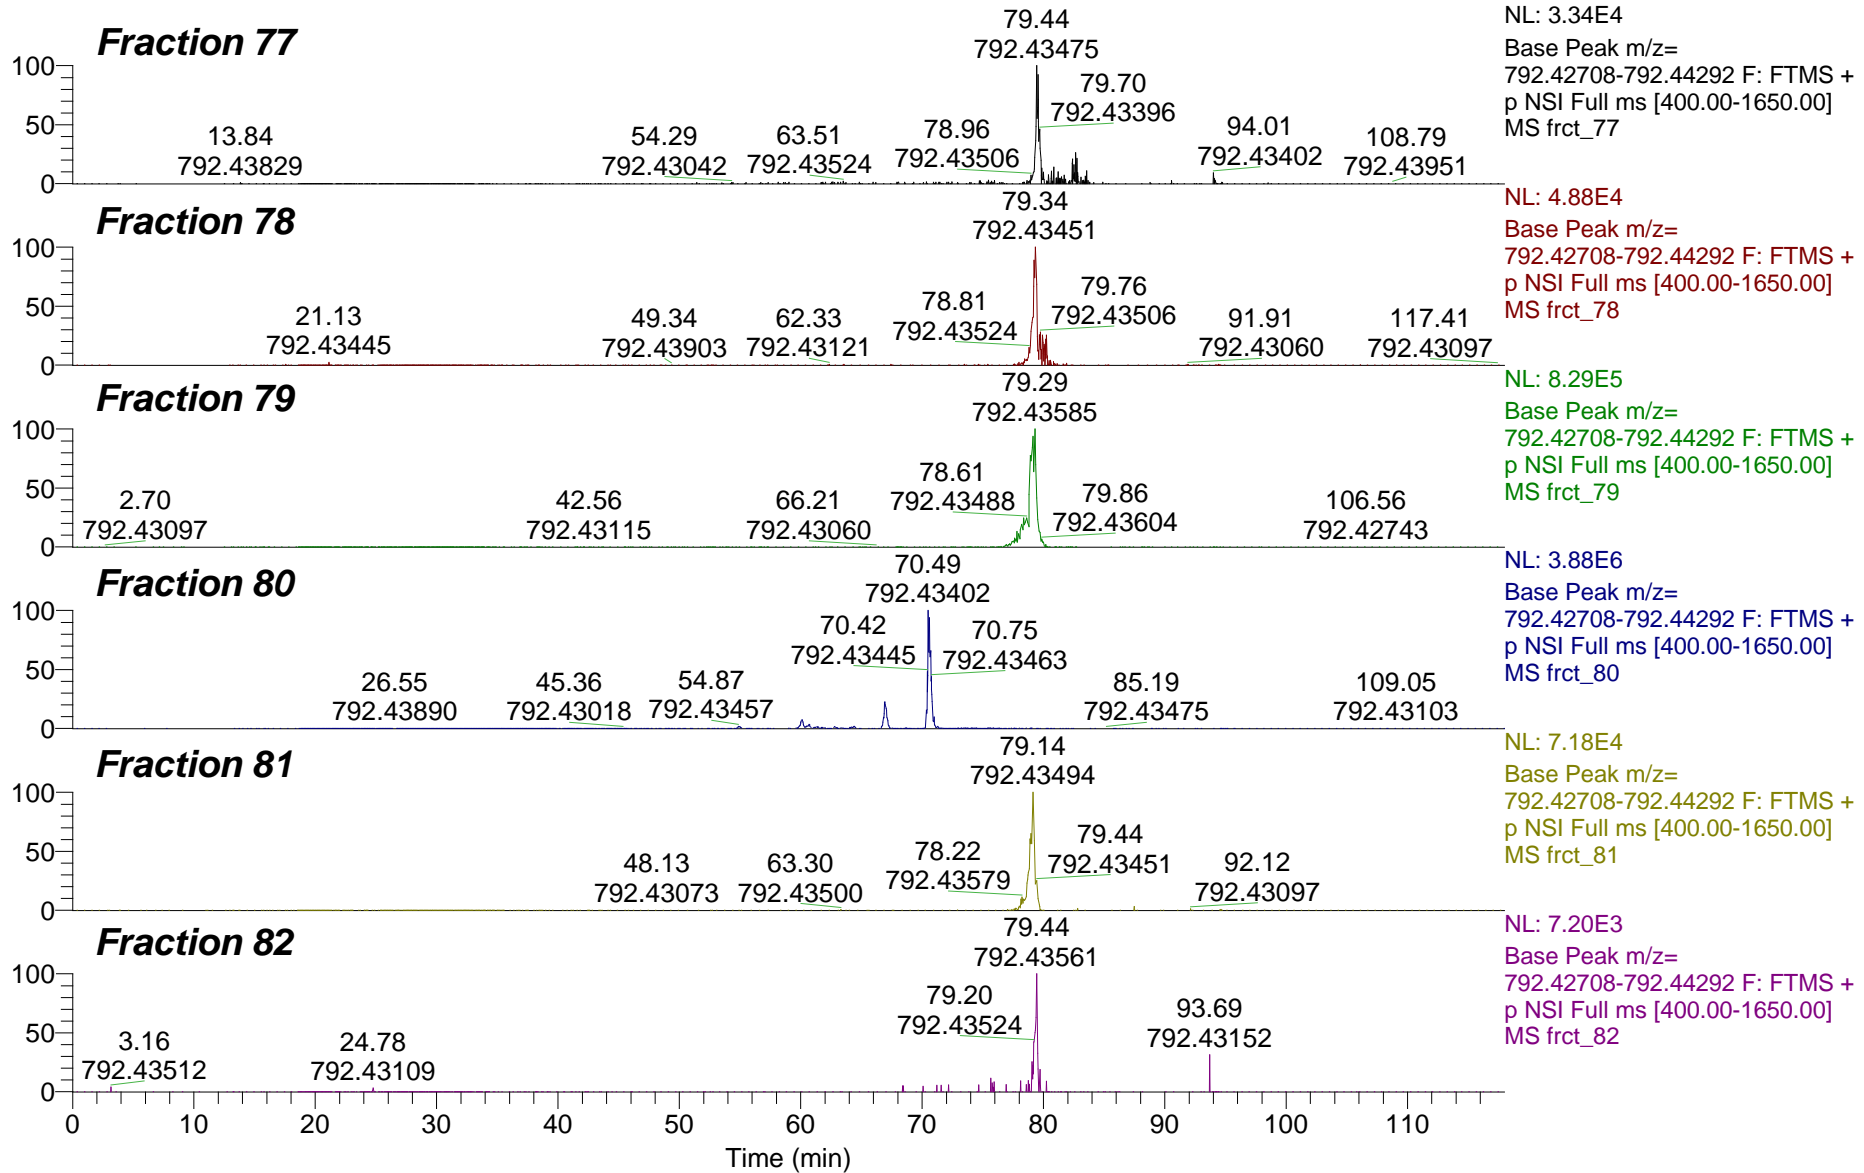

**H.** Extracted Ion Chromatogram of the peptide with m/z= 792.44 in of isolated fractions from ApoA-I digested at arginine (R) residues (Part 3)

RT: 0.00 - 118.00

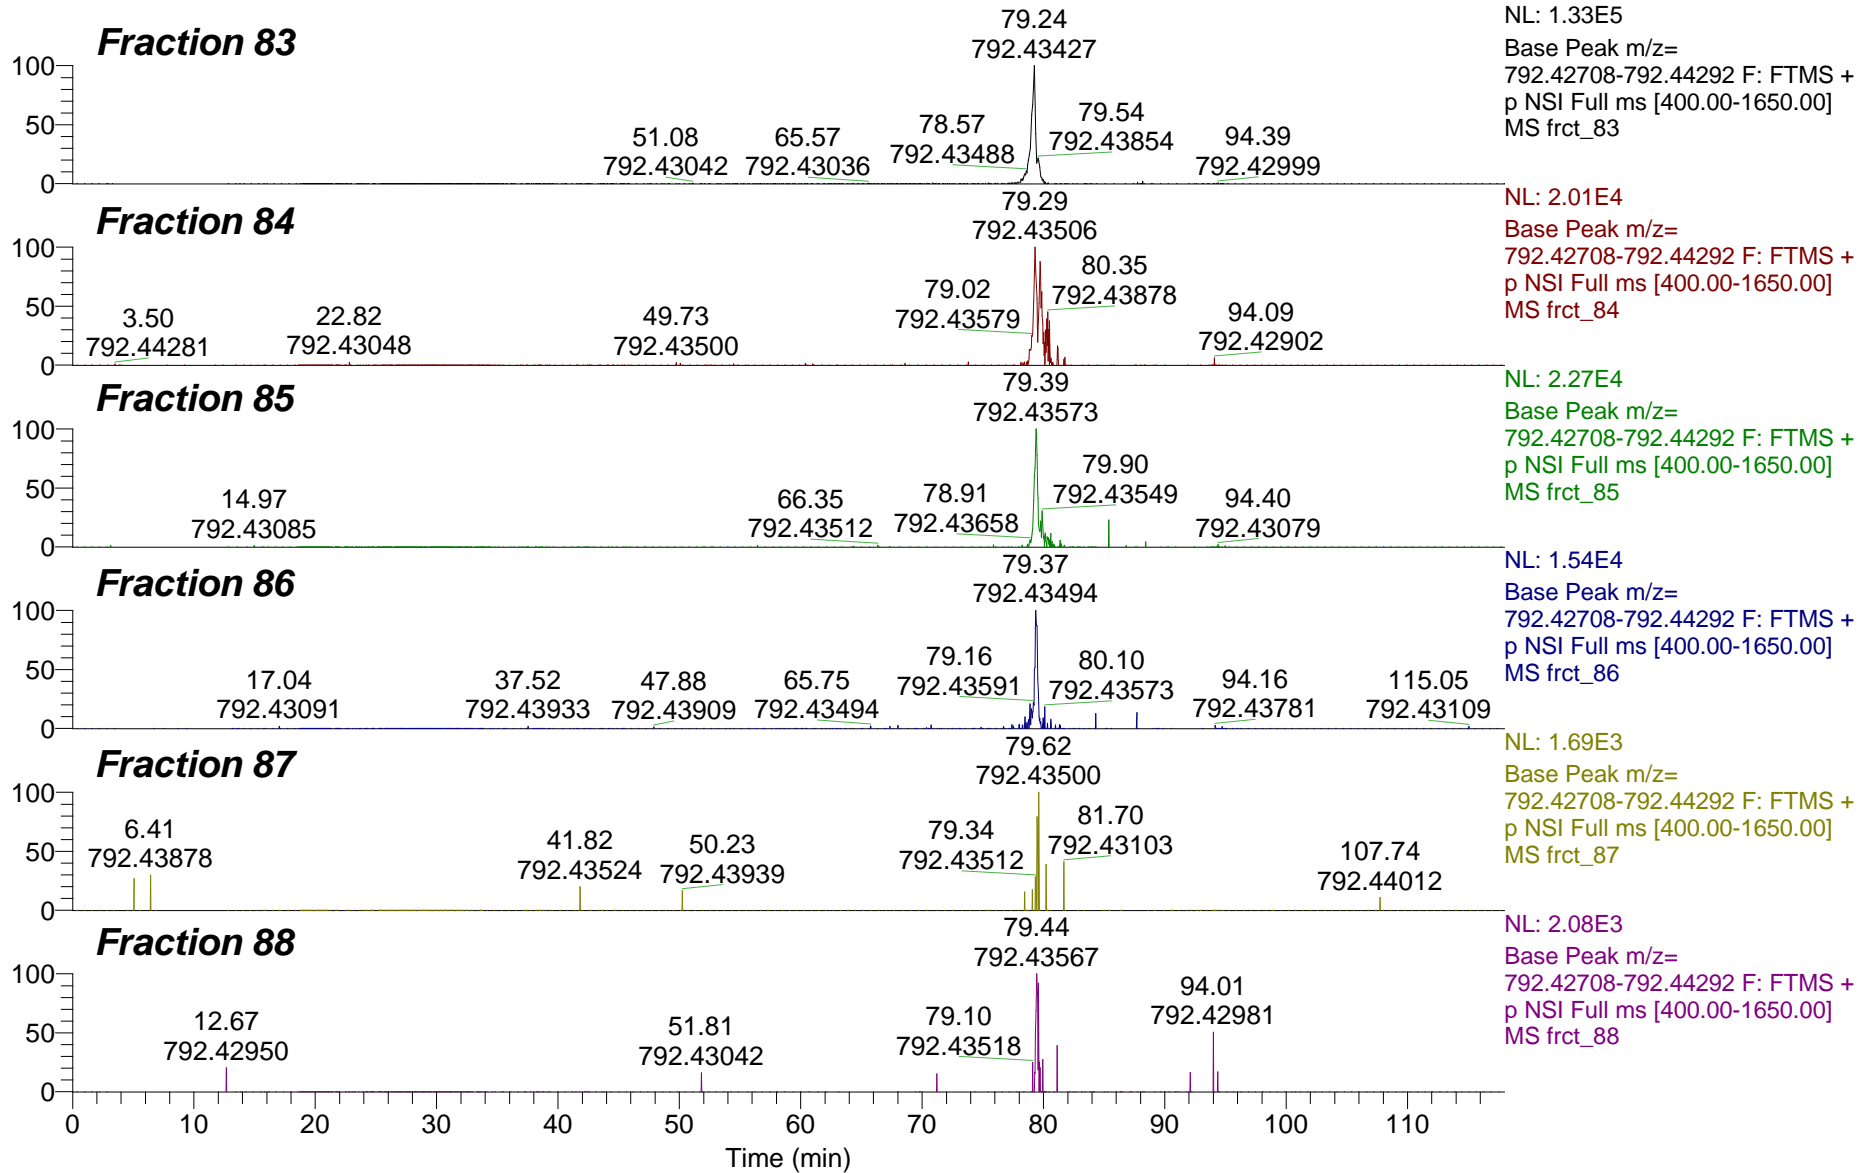

# I. Extracted Ion Chromatogram of the peptide with m/z= 796.94 in of isolated fractions from ApoA-I digested at arginine (R) residues (Part 1)

RT: 0.00 - 118.00

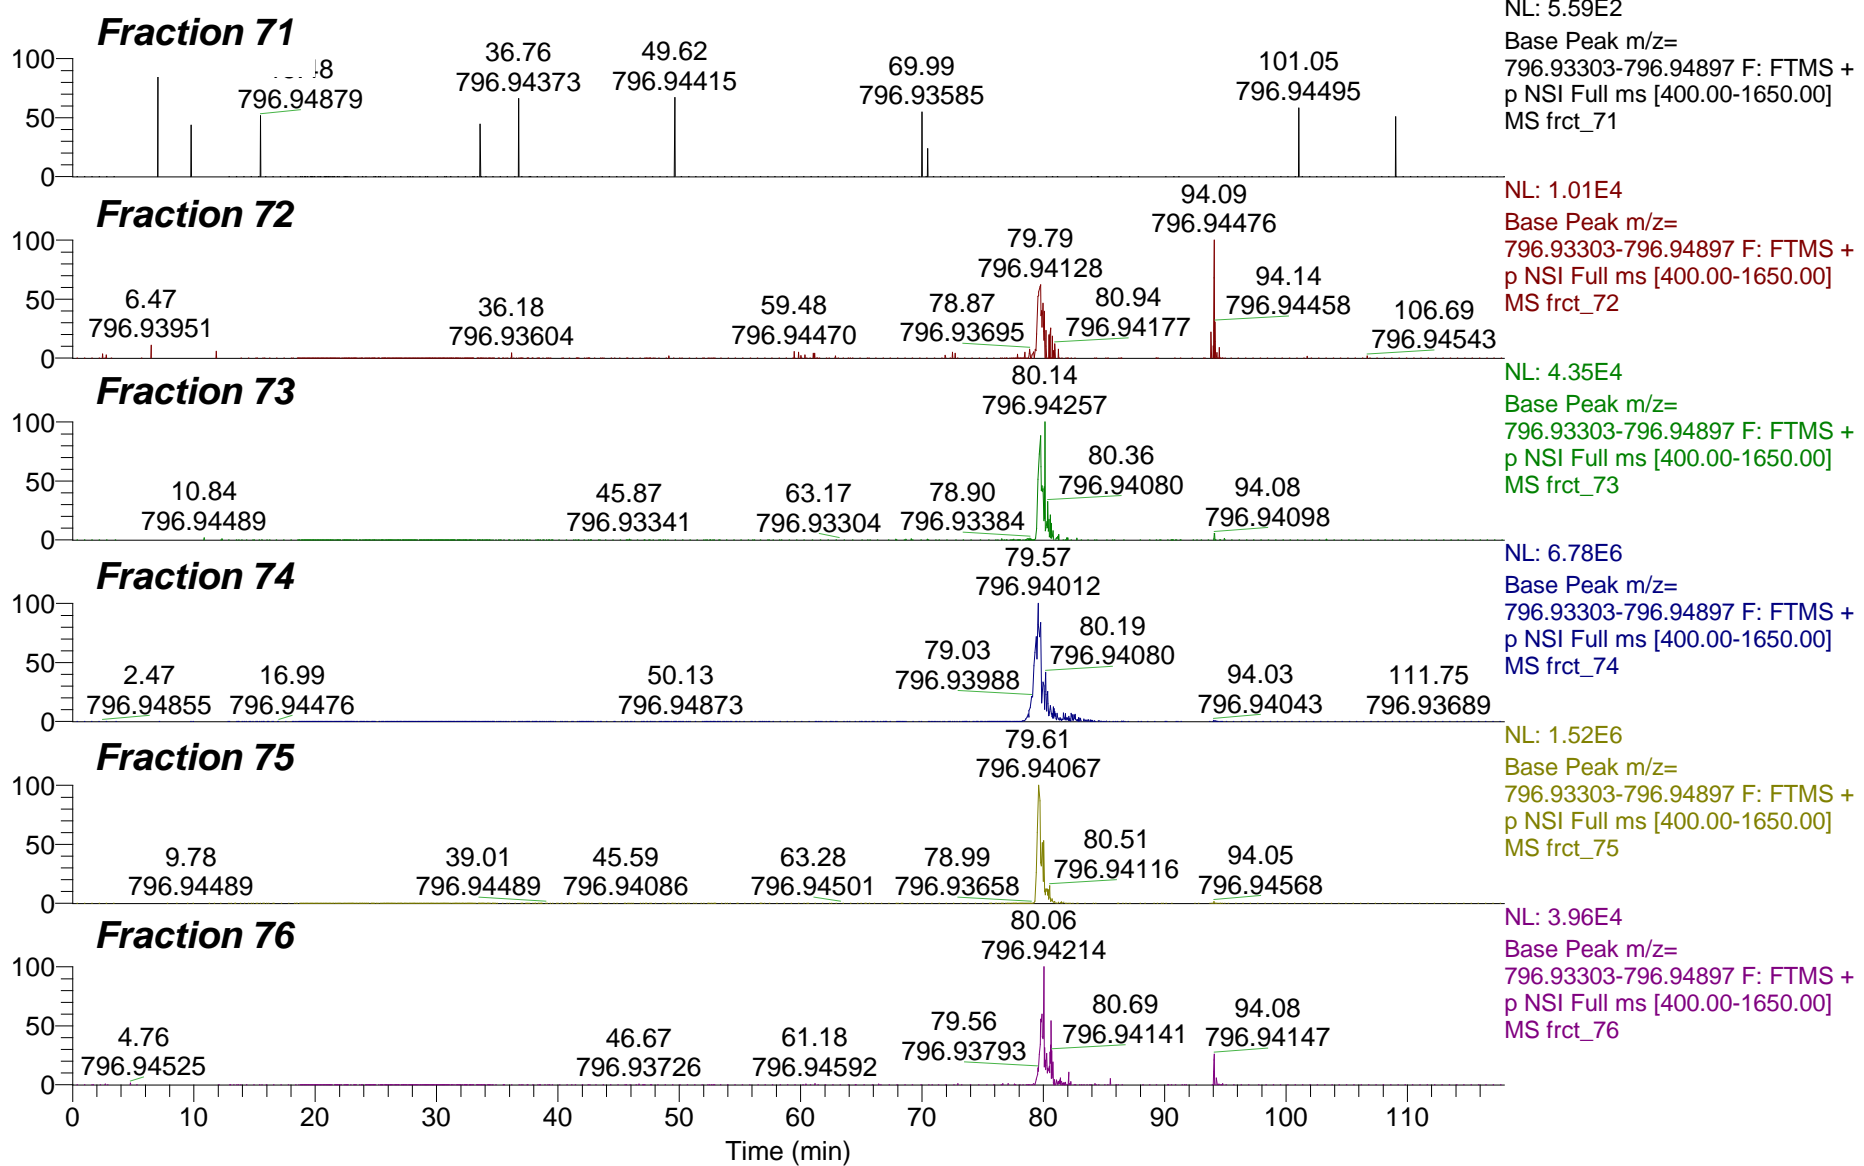

I. Extracted Ion Chromatogram of the peptide with m/z= 796.94 in of isolated fractions from ApoA-I digested at arginine (R) residues (Part 2)

RT: 0.00 - 118.00

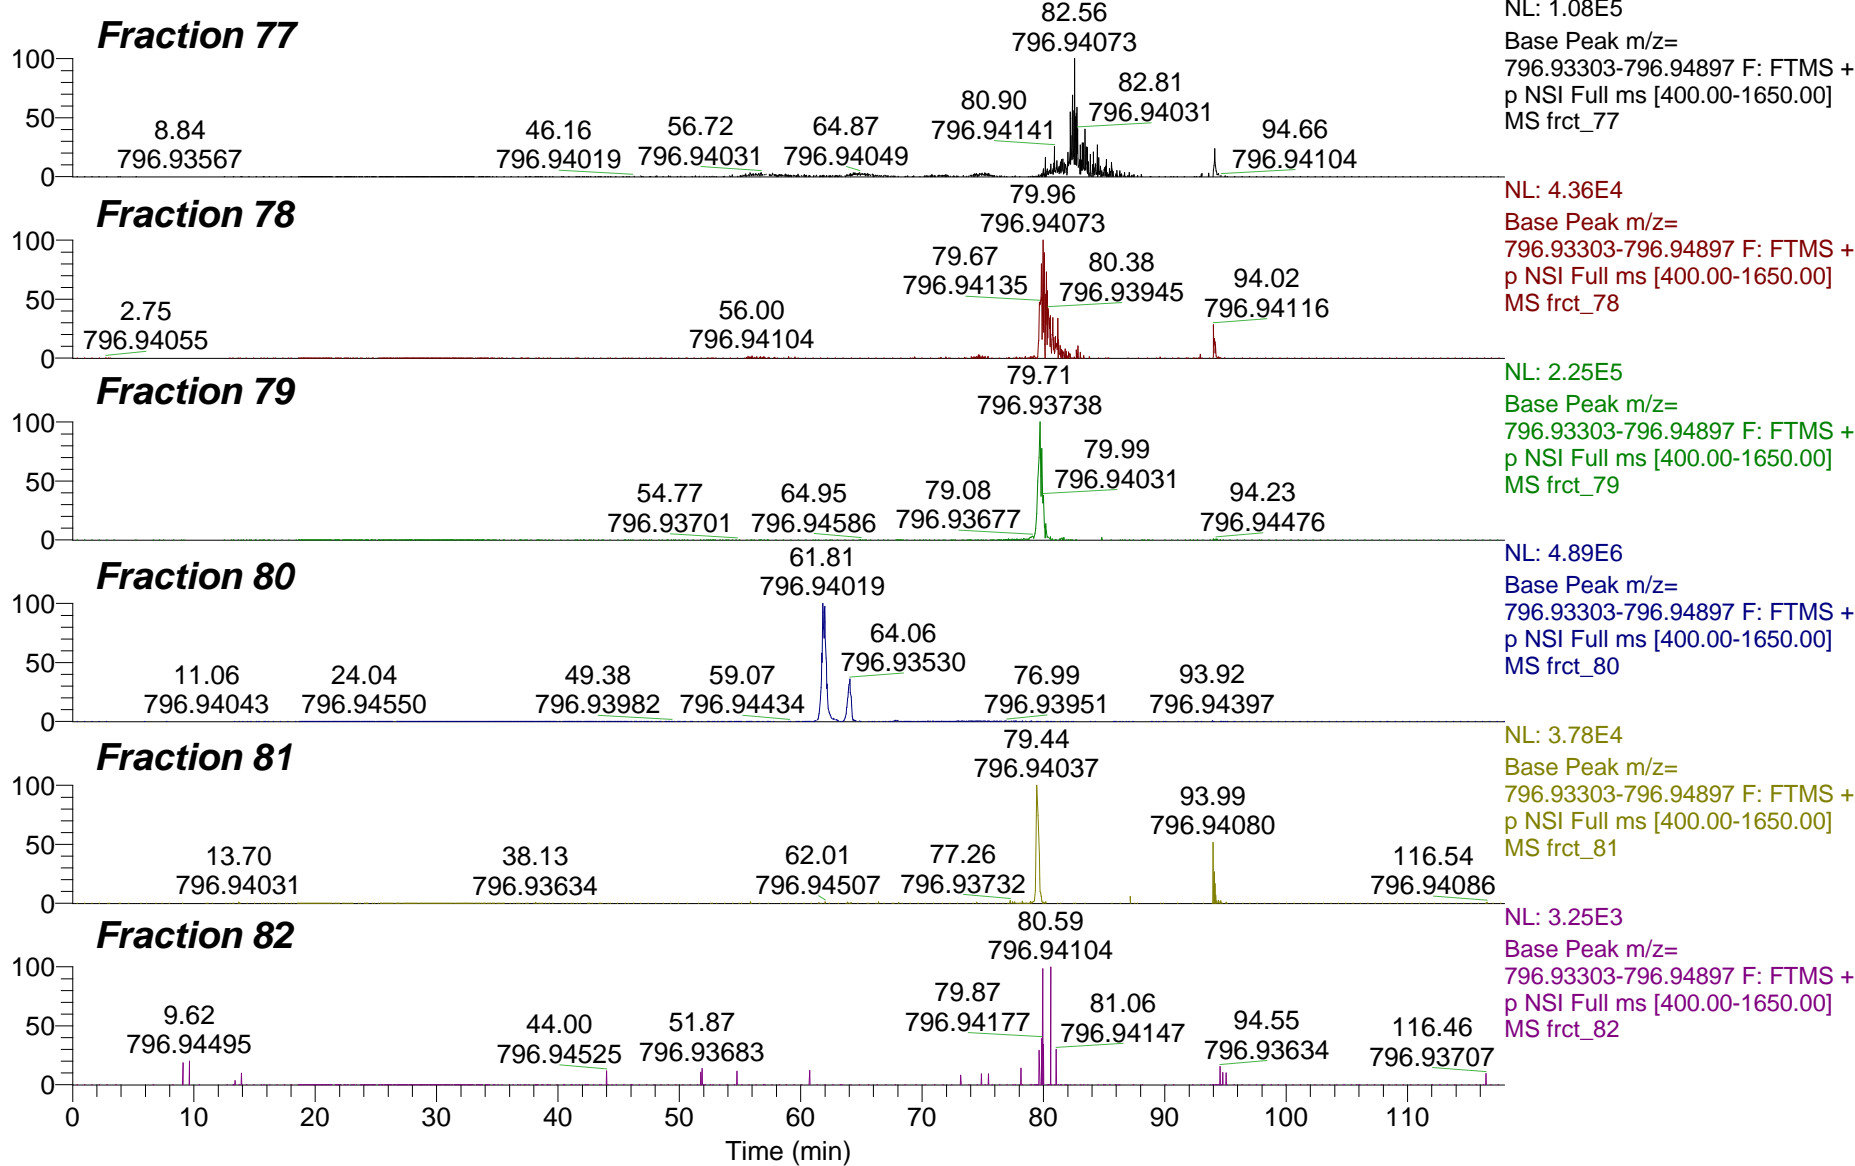

# I. Extracted Ion Chromatogram of the peptide with m/z= 796.94 in of isolated fractions from ApoA-I digested at arginine (R) residues (Part 3)

RT: 0.00 - 118.00

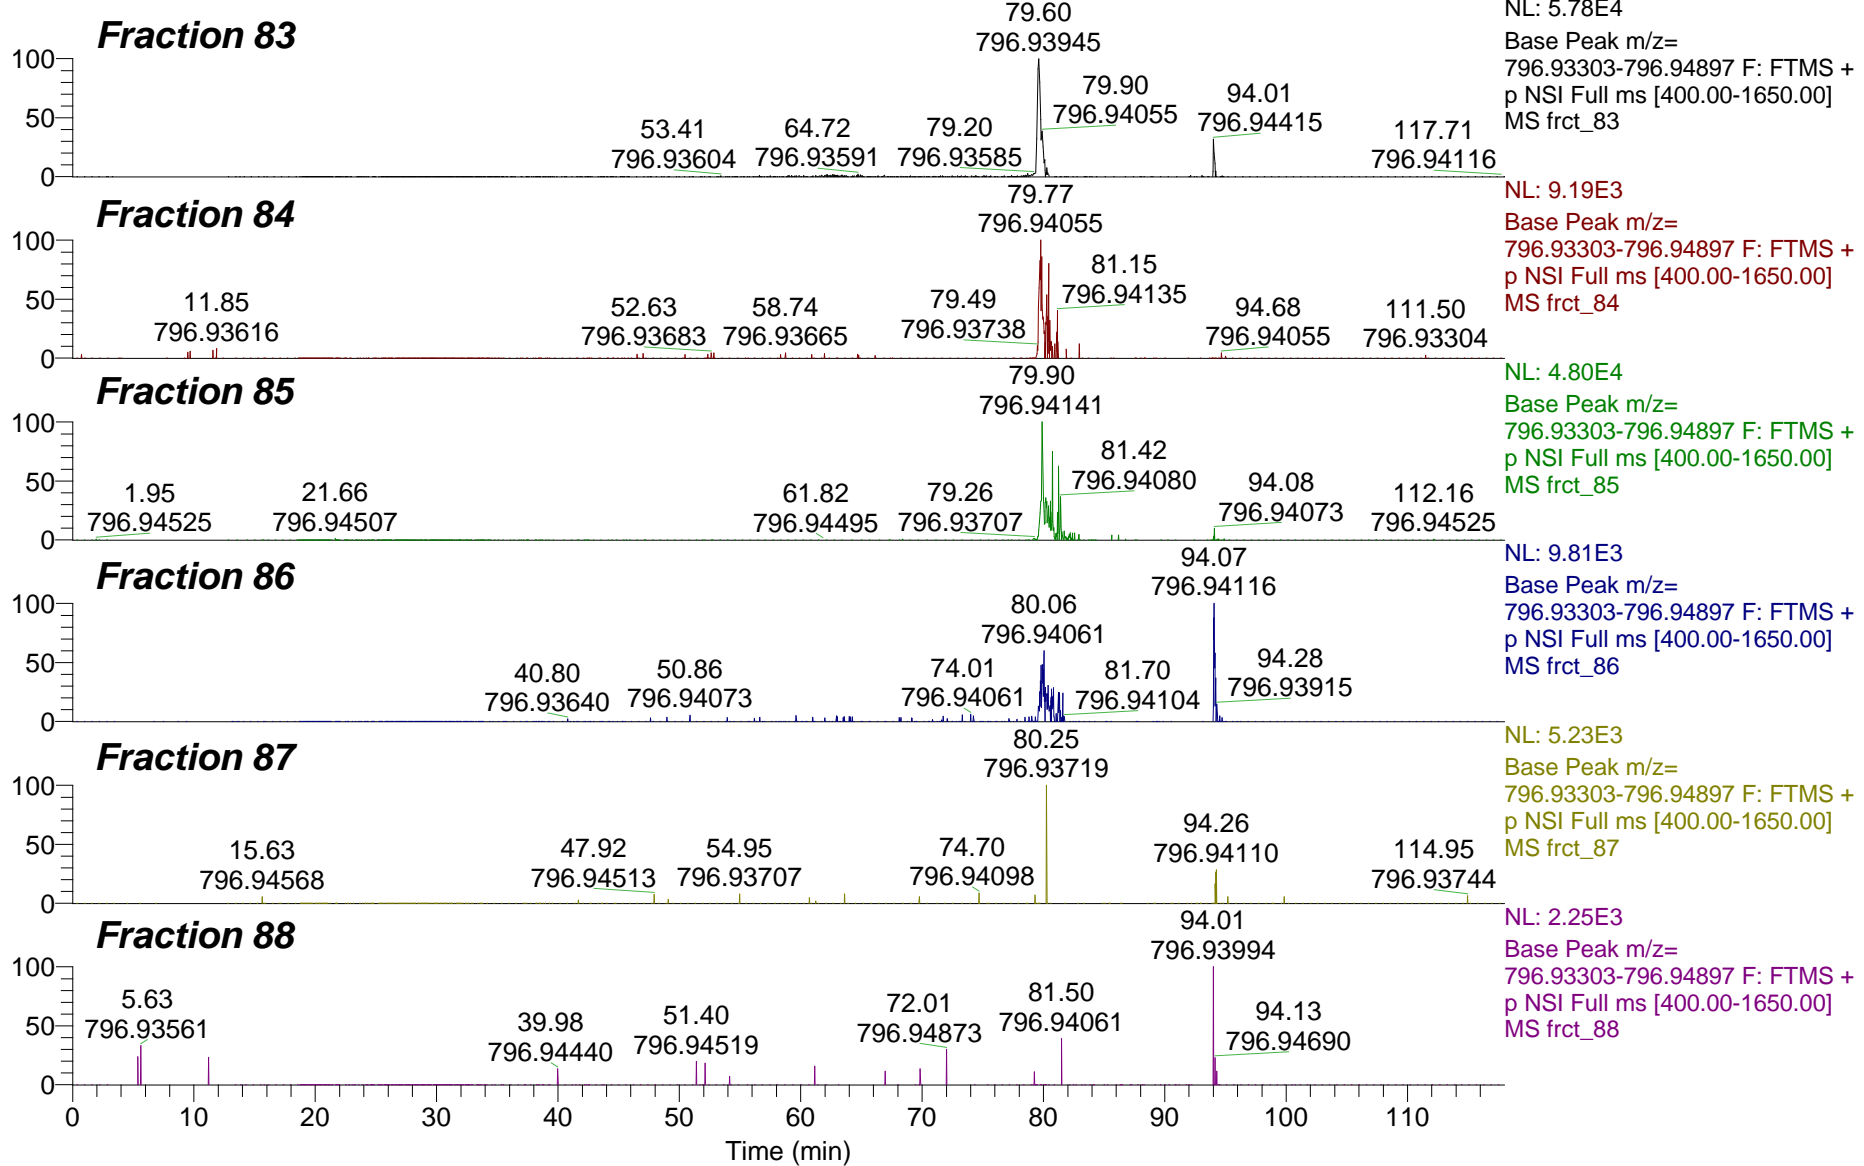

**J.** Extracted Ion Chromatogram of the peptide with m/z= 1056.24 in of isolated fractions from ApoA-I digested at arginine (R) residues (Part 1)

RT: 0.00 - 118.00

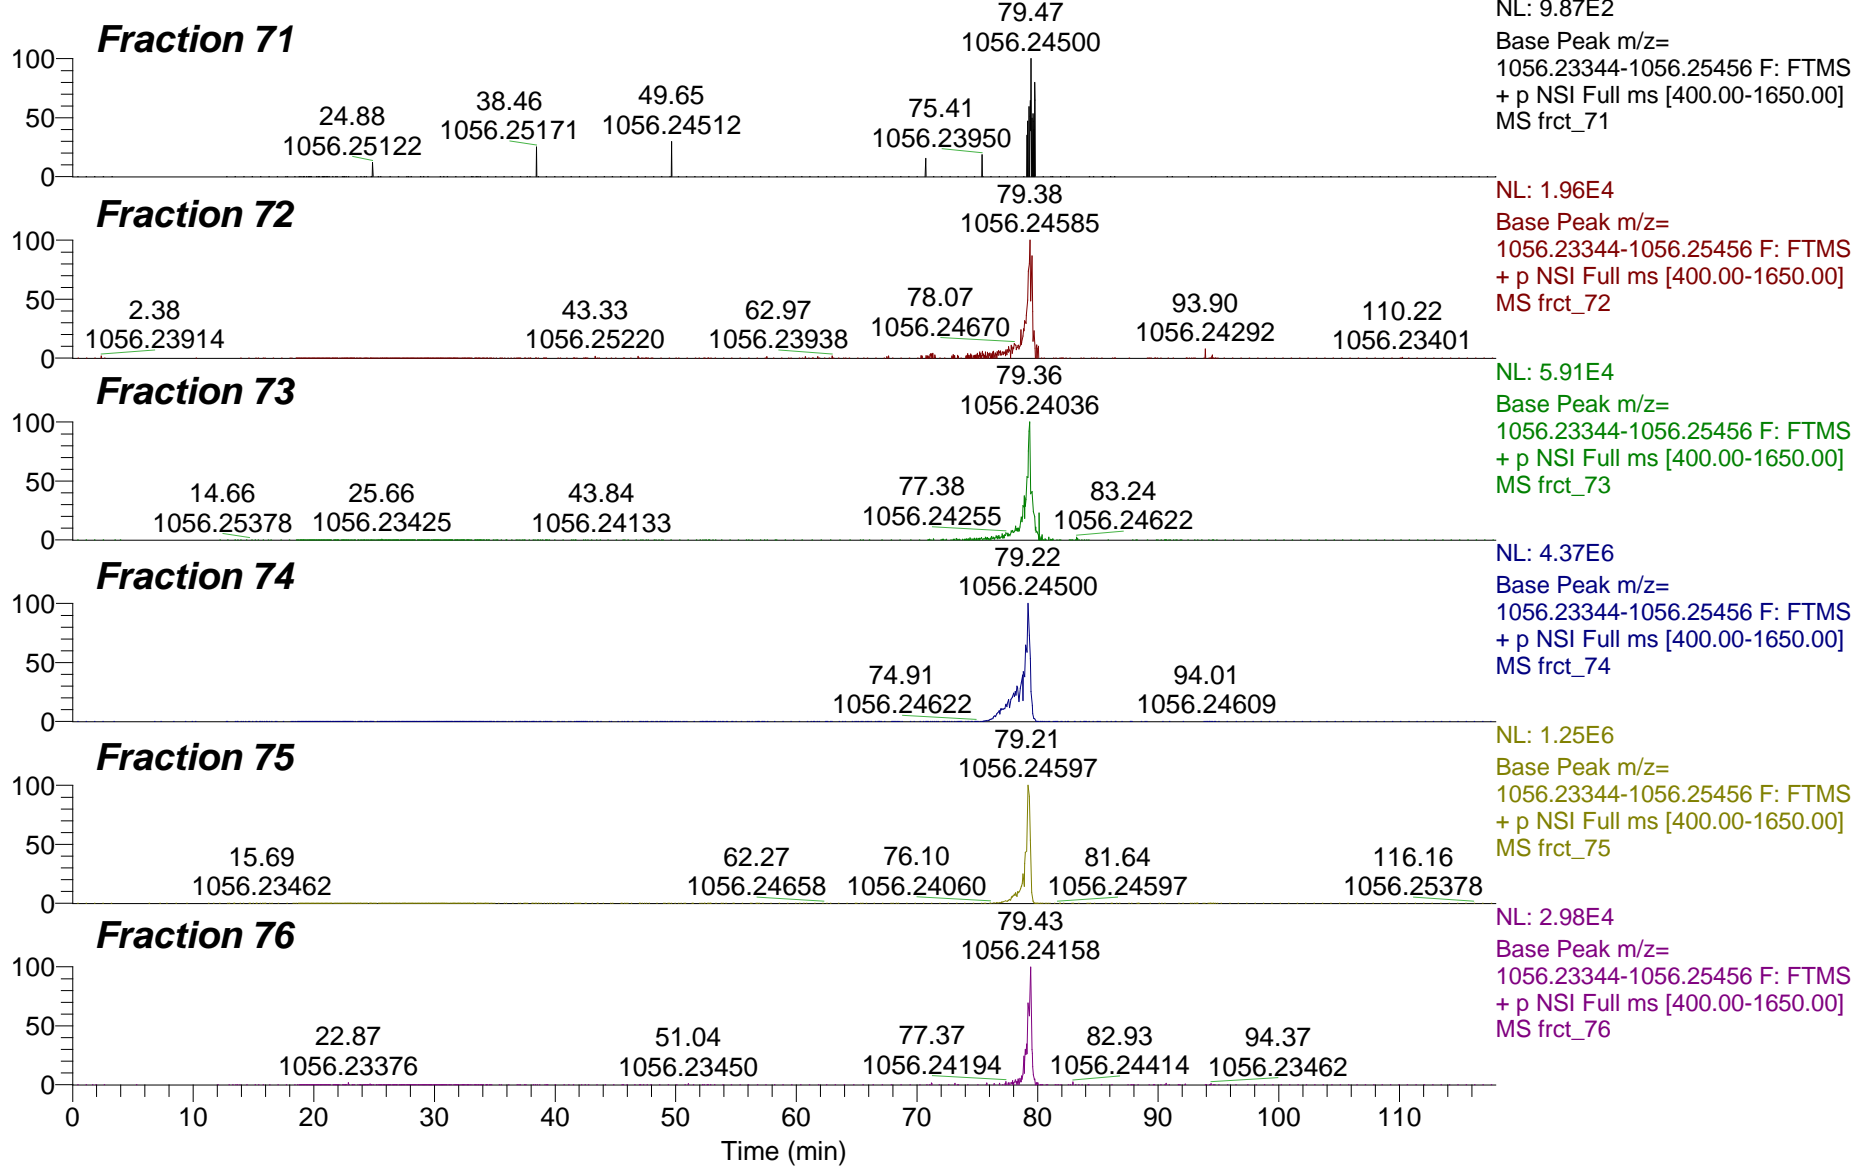

**J.** Extracted Ion Chromatogram of the peptide with m/z= 1056.24 in of isolated fractions from ApoA-I digested at arginine (R) residues (Part 2)

RT: 0.00 - 118.00

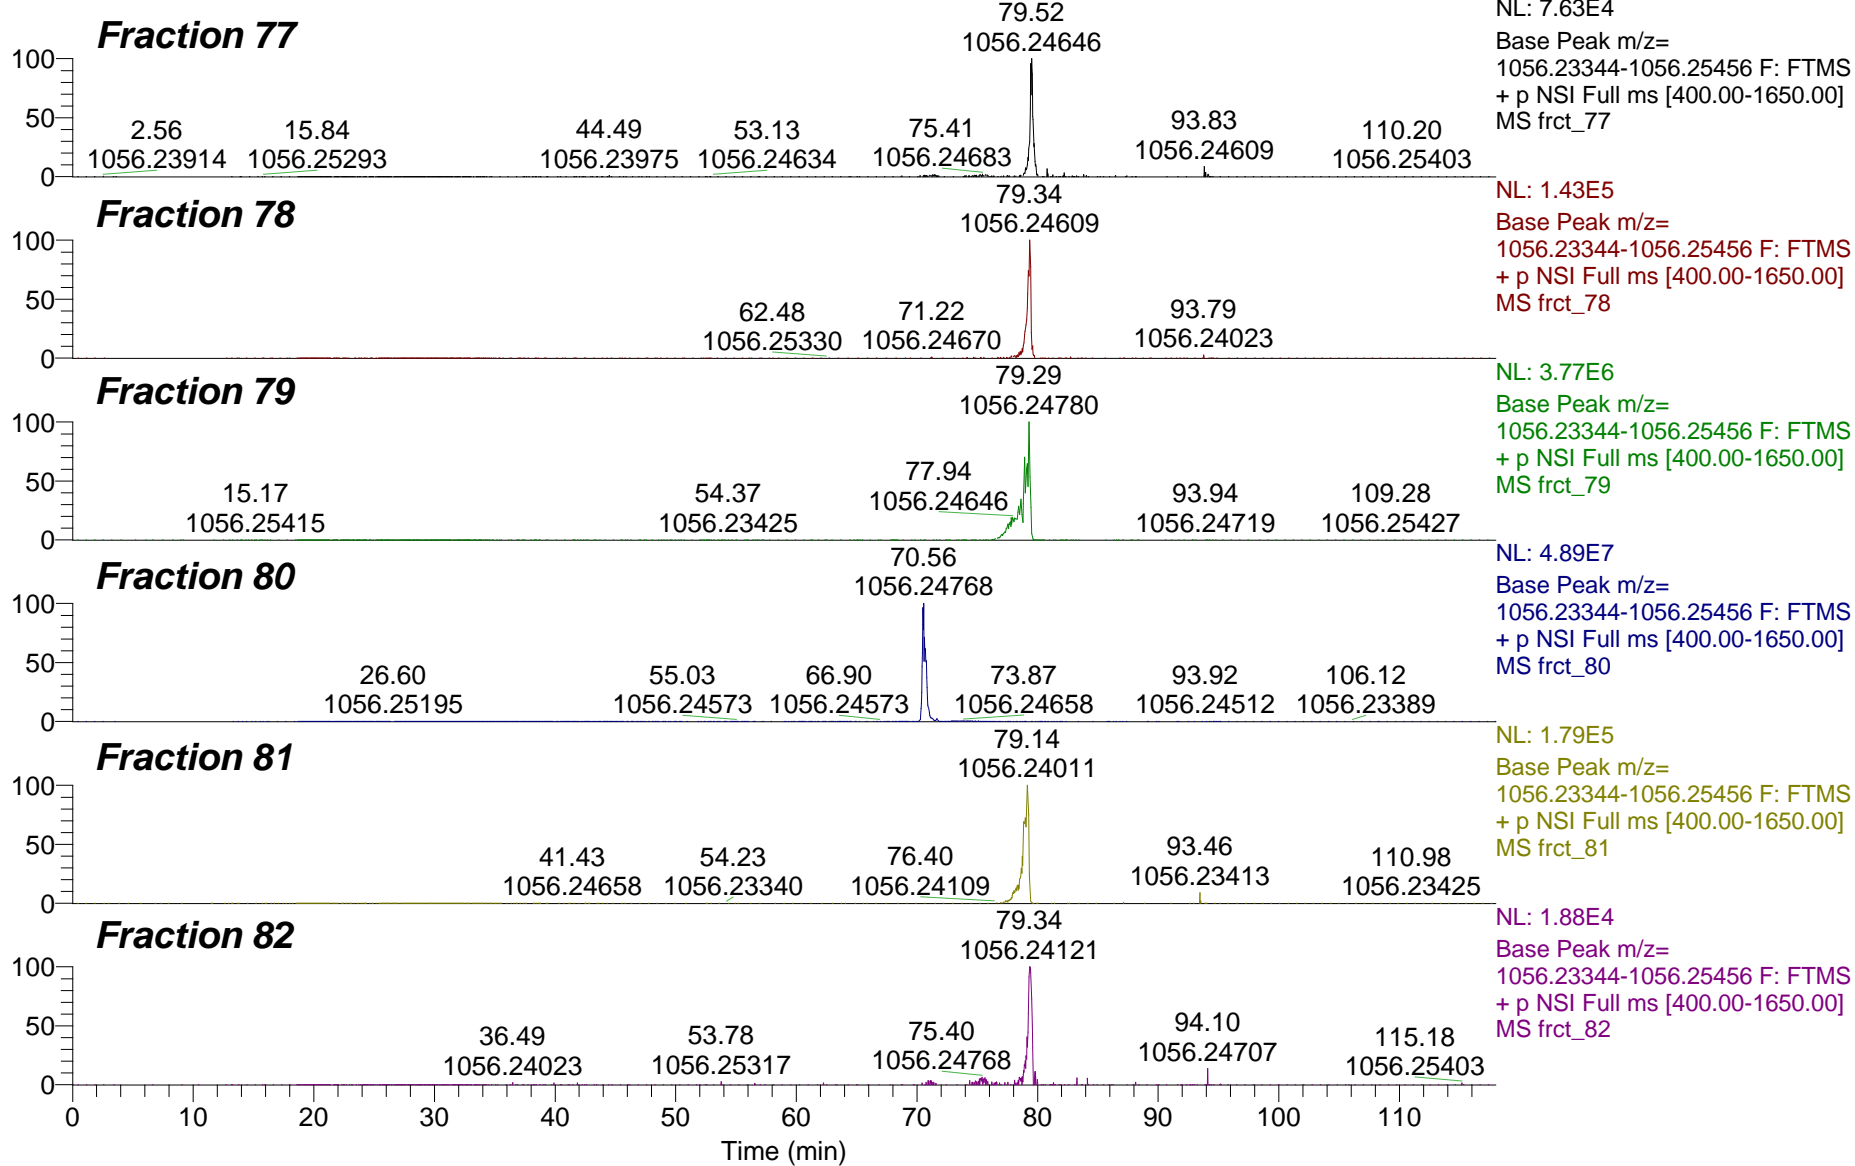

# J. Extracted Ion Chromatogram of the peptide with m/z= 1056.24 in of isolated fractions from ApoA-I digested at arginine (R) residues (Part 3)

RT: 0.00 - 118.00

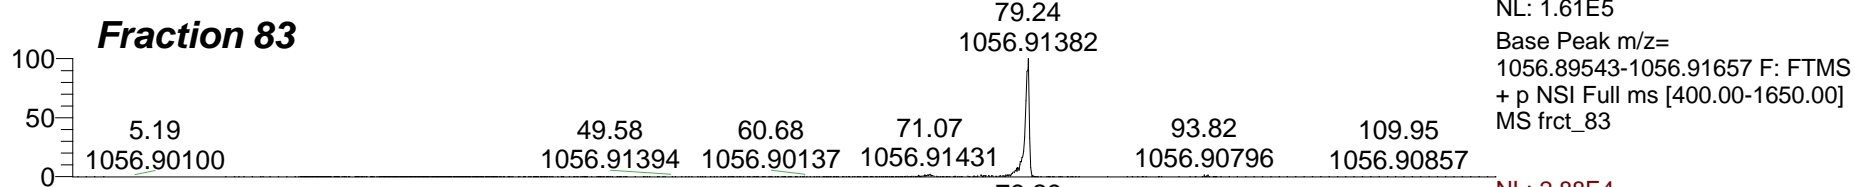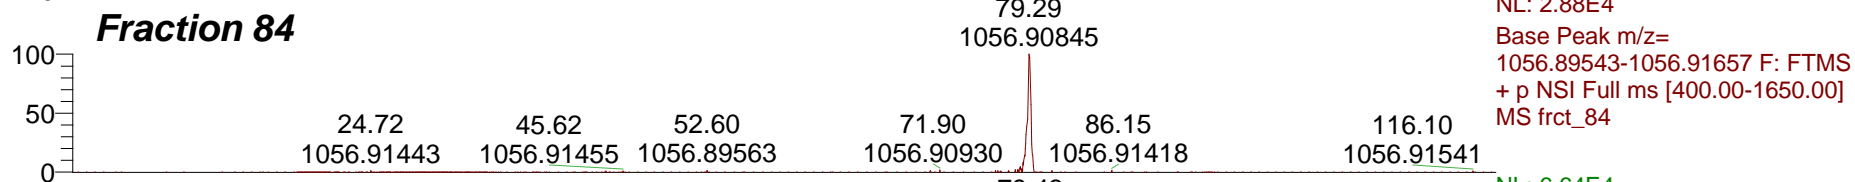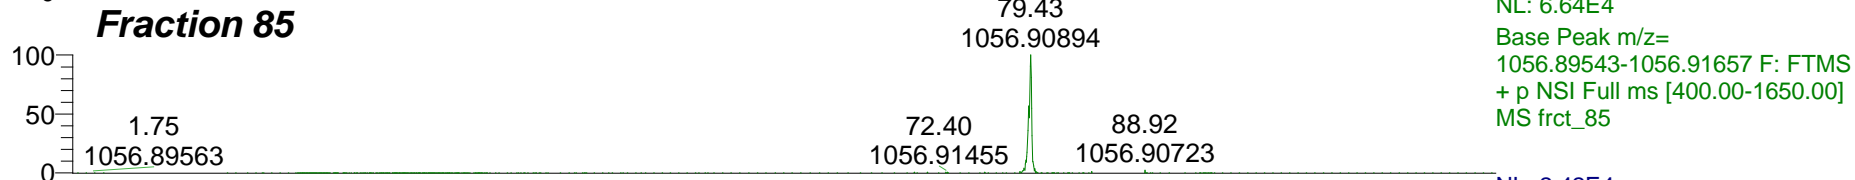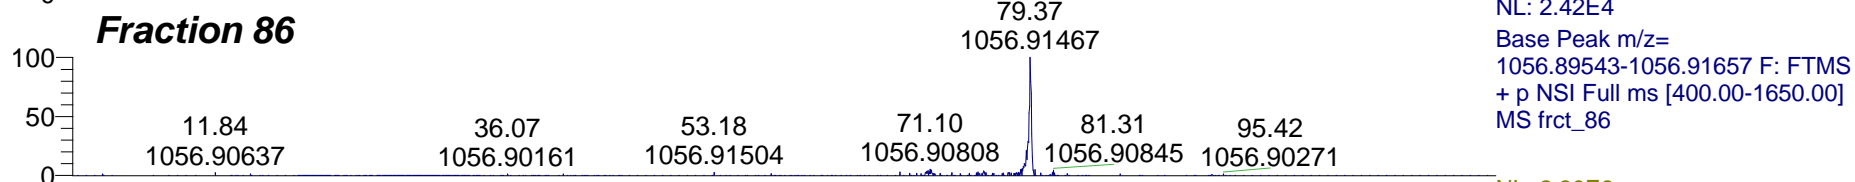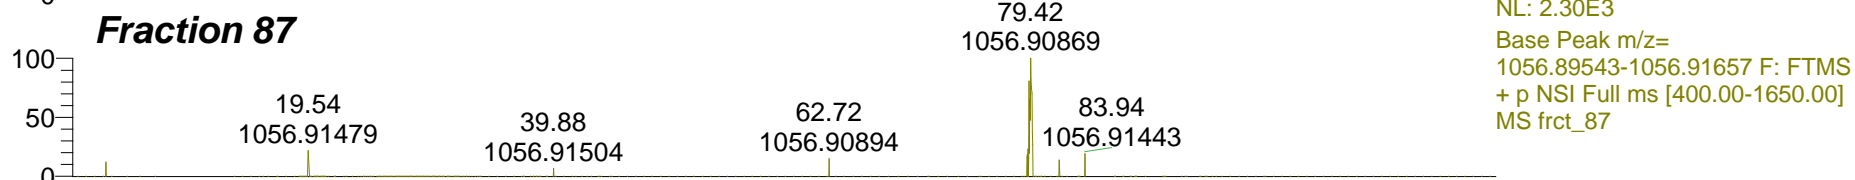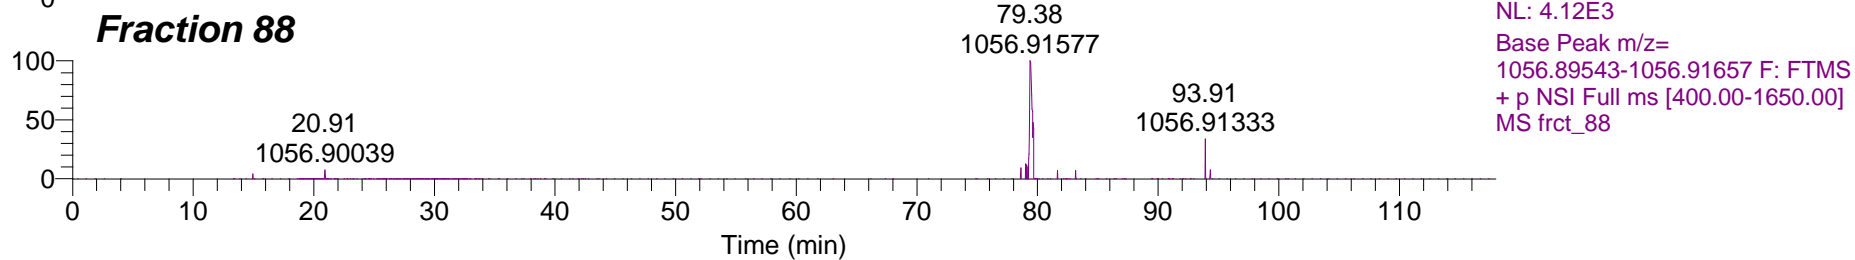



# K. Extracted Ion Chromatogram of the peptide with m/z= 1061.91 in of isolated fractions from ApoA-I digested at arginine (R) residues (Part 1)

RT: 0.00 - 118.00

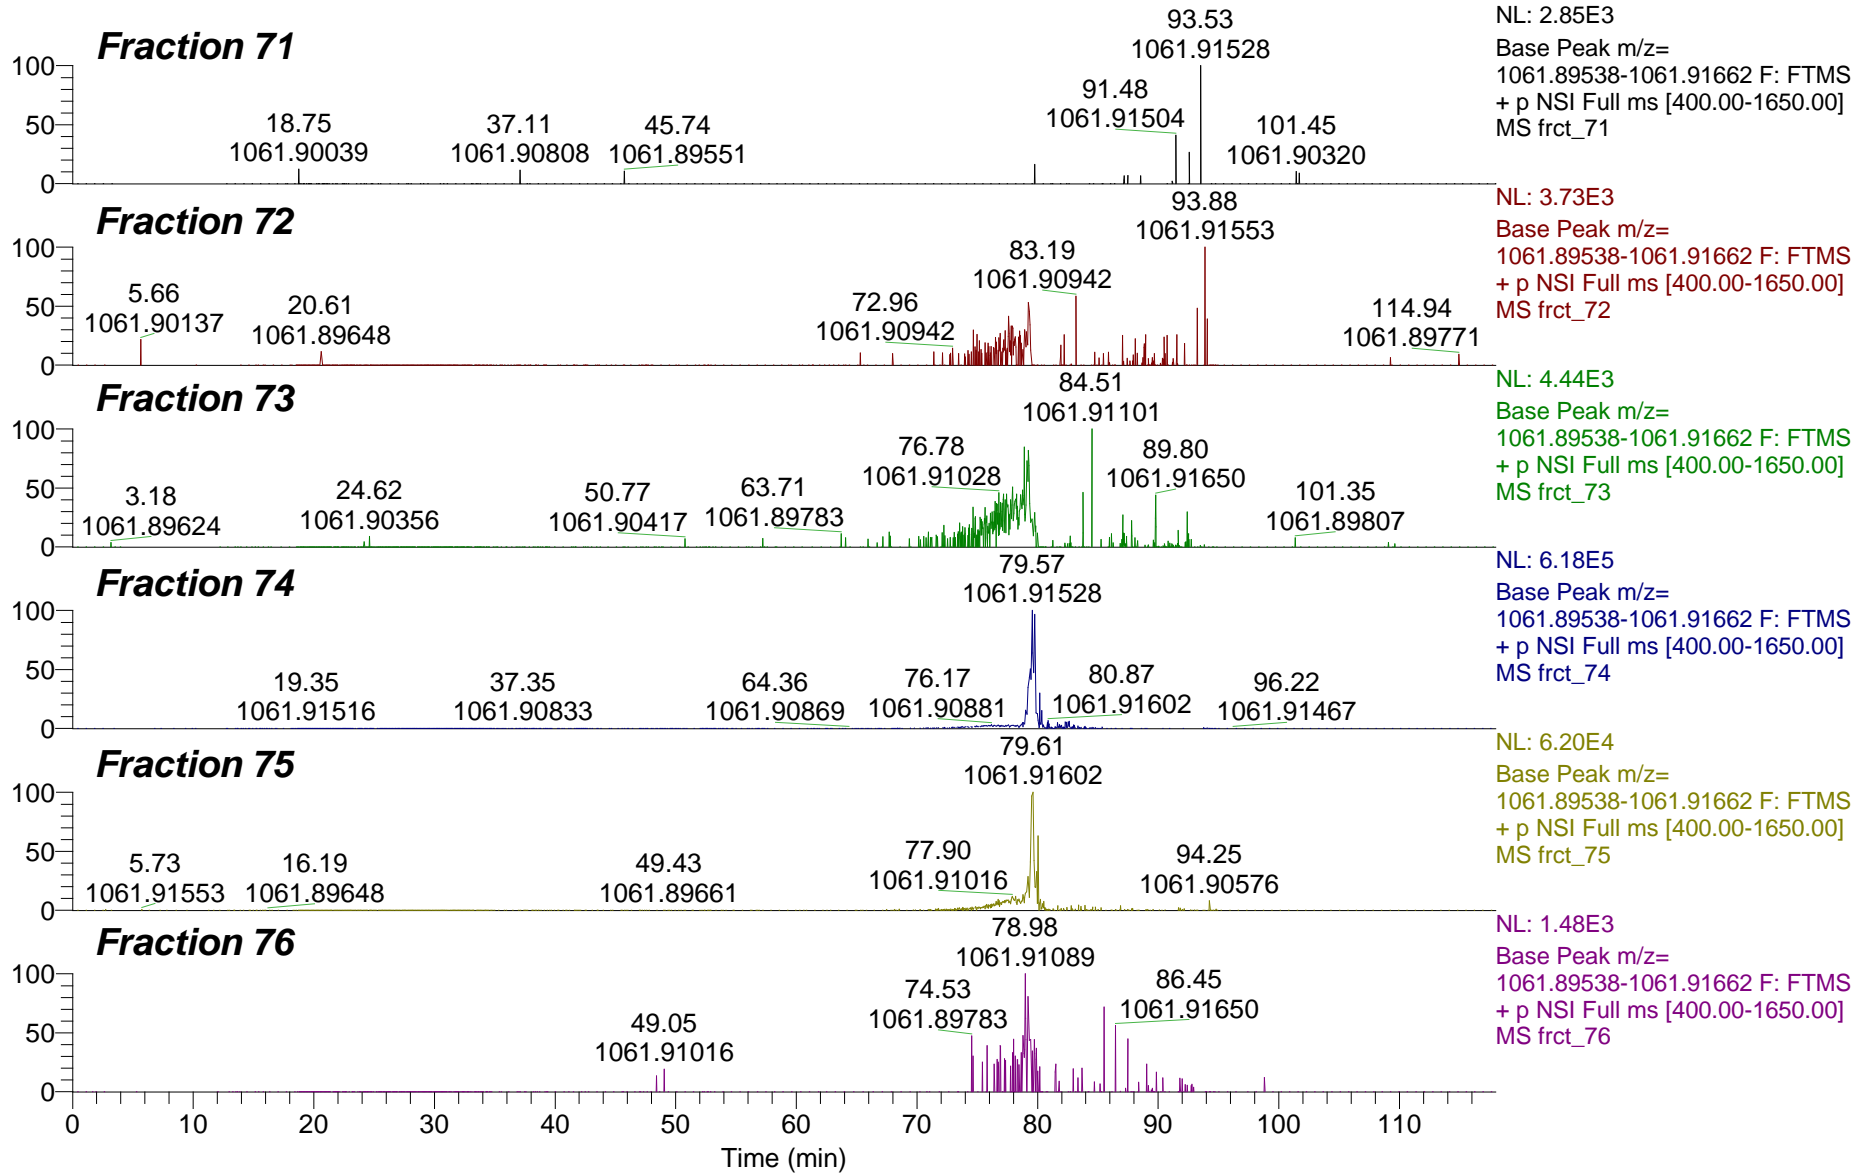

# K. Extracted Ion Chromatogram of the peptide with m/z= 1061.91 in of isolated fractions from ApoA-I digested at arginine (R) residues (Part 2)

RT: 0.00 - 118.00

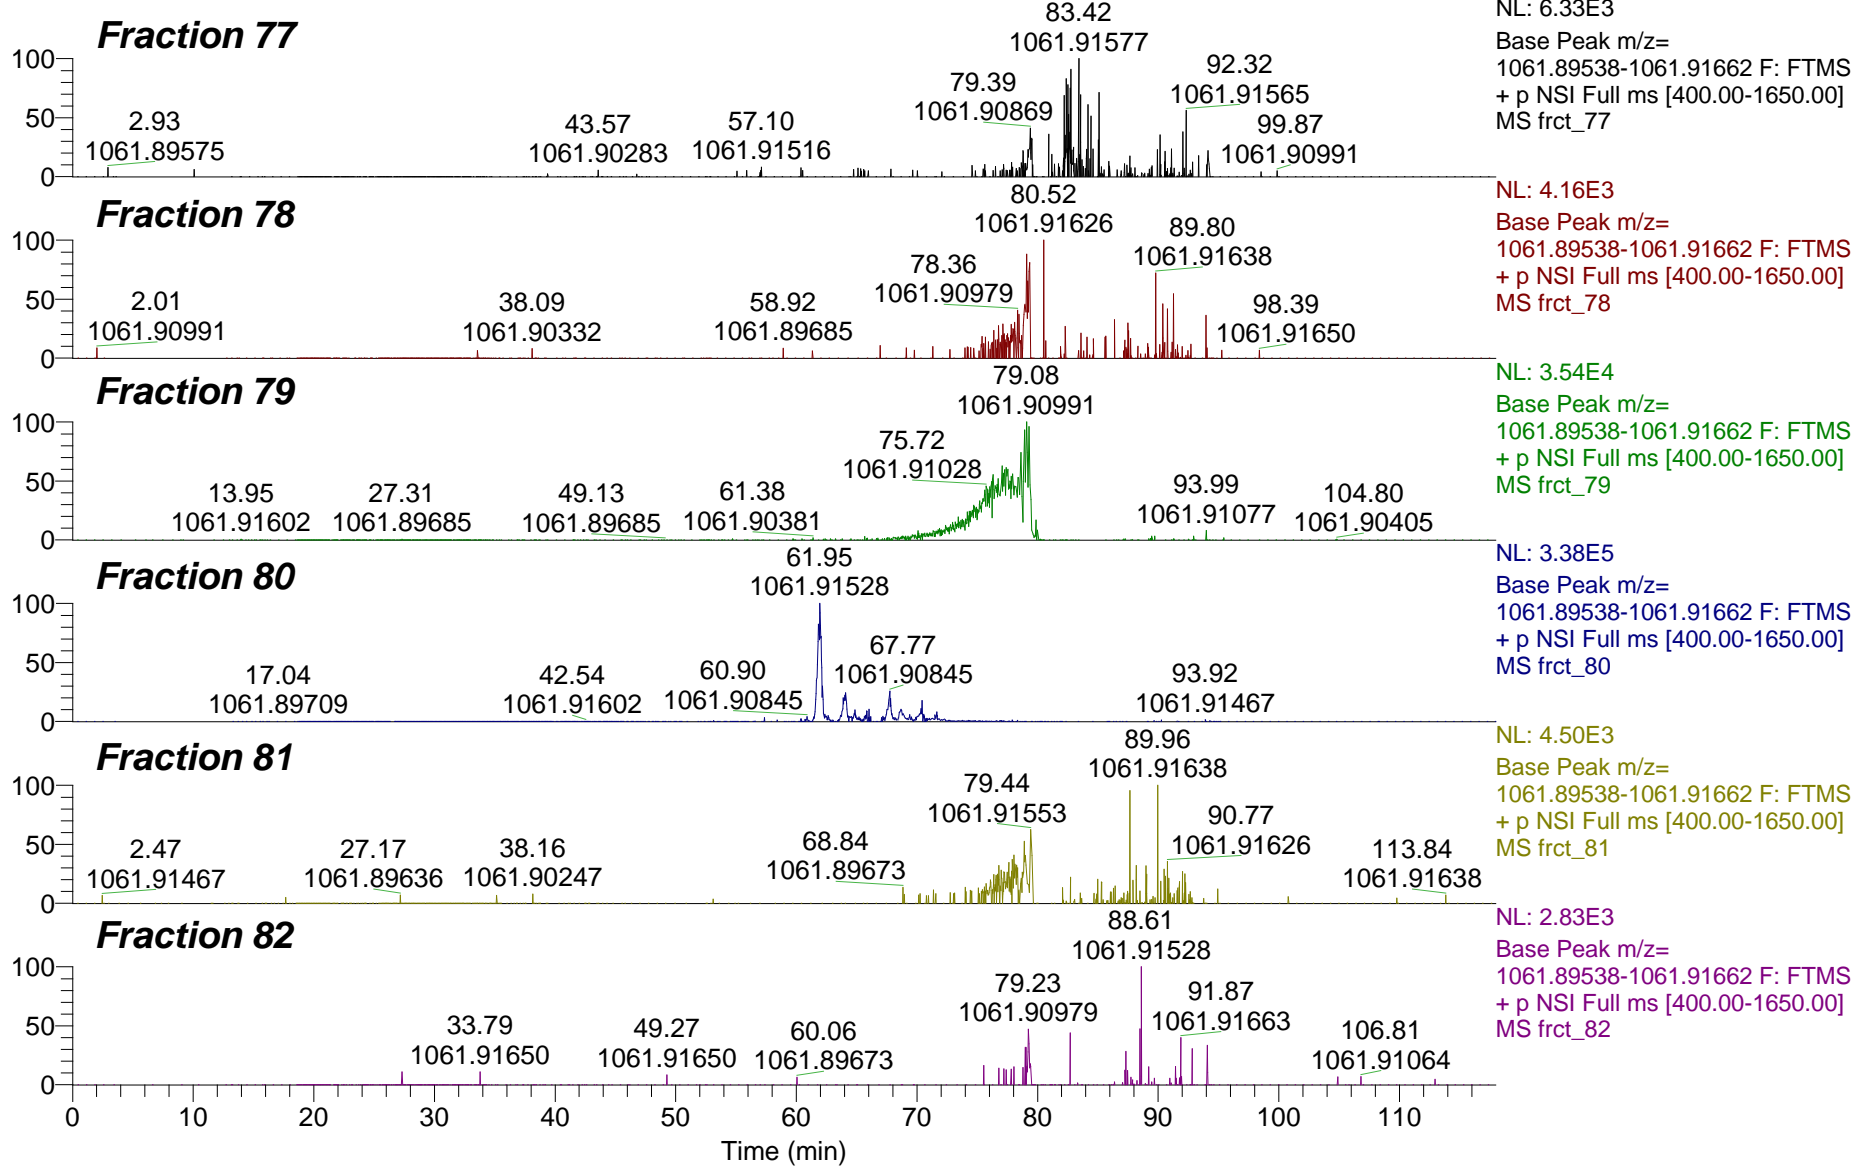

**K.** Extracted Ion Chromatogram of the peptide with m/z= 1061.91 in of isolated fractions from ApoA-I digested at arginine (R) residues (Part 3)

RT: 0.00 - 118.00

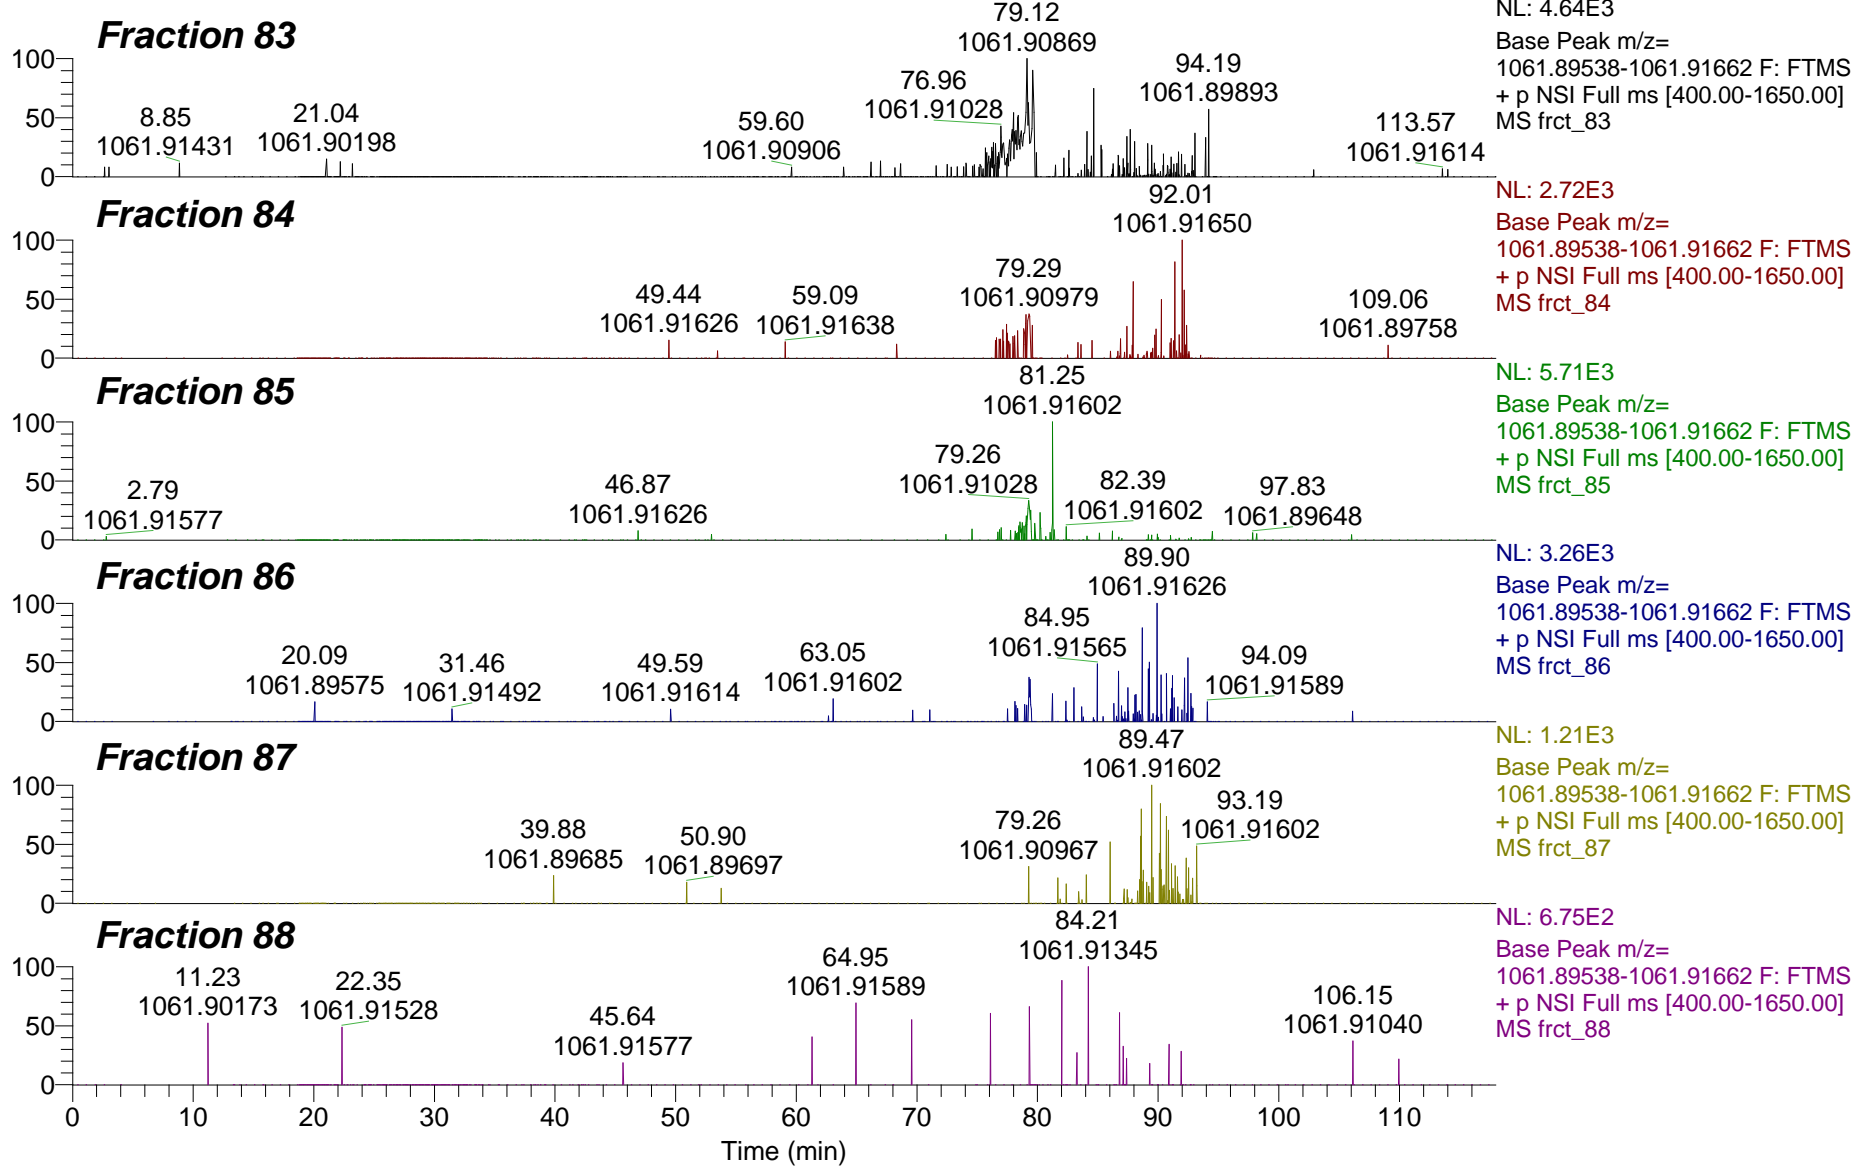

# L. ApoA-I peptides identified in the fraction 80 using the Mascot Distiller tool.

| Start | End | Observed  | Mr(expt)  | Mr(calc)  | ppm  | MC | Score | Expect  | Peptide                                                                       |
|-------|-----|-----------|-----------|-----------|------|----|-------|---------|-------------------------------------------------------------------------------|
| 240   | 267 | 1055.9100 | 3164.7082 | 3164.7009 | 2.3  | 0  | 119   | 1.3E-12 | R.QGLLPVLESFKVSFLSALEEYTKKLNLTQ.- + Gln->pyro-Glu (N-term Q)                  |
| 240   | 267 | 796.4405  | 3181.7329 | 3181.7274 | 1.72 | 0  | 106   | 2.9E-11 | R.QGLLPVLESFKVSFLSALEEYTKKLNLTQ.-                                             |
| 240   | 267 | 1055.9123 | 3164.7151 | 3164.7009 | 4.48 | 0  | 102   | 6.8E-11 | R.QGLLPVLESFKVSFLSALEEYTKKLNLTQ.- + Gln->pyro-Glu (N-term Q)                  |
| 240   | 267 | 1055.9101 | 3164.7085 | 3164.7009 | 2.39 | 0  | 100   | 1.1E-10 | R.QGLLPVLESFKVSFLSALEEYTKKLNLTQ.- + Gln->pyro-Glu (N-term Q)                  |
| 240   | 267 | 1055.9099 | 3164.7079 | 3164.7009 | 2.2  | 0  | 80    | 1E-08   | R.QGLLPVLESFKVSFLSALEEYTKKLNLTQ.- + Gln->pyro-Glu (N-term Q)                  |
| 240   | 267 | 796.4398  | 3181.7302 | 3181.7274 | 0.86 | 0  | 71    | 7.5E-08 | R.QGLLPVLESFKVSFLSALEEYTKKLNLTQ.-                                             |
| 240   | 267 | 1055.9098 | 3164.7076 | 3164.7009 | 2.11 | 0  | 66    | 2.7E-07 | R.QGLLPVLESFKVSFLSALEEYTKKLNLTQ.- + Gln->pyro-Glu (N-term Q)                  |
| 240   | 267 | 1055.9099 | 3164.7079 | 3164.7009 | 2.2  | 0  | 66    | 2.3E-07 | R.QGLLPVLESFKVSFLSALEEYTKKLNLTQ.- + Gln->pyro-Glu (N-term Q)                  |
| 86    | 140 | 1127.5561 | 6759.2929 | 6759.2788 | 2.09 | 1  | 65    | 4.2E-07 | R.EQLGPVTQEFWDNLEKETEGLRQEMSKDLEEVKAKVQPYLDDFQKKWQEEEMELR.Q                   |
| 240   | 267 | 1055.9098 | 3164.7076 | 3164.7009 | 2.11 | 0  | 64    | 4E-07   | R.QGLLPVLESFKVSFLSALEEYTKKLNLTQ.- + Gln->pyro-Glu (N-term Q)                  |
| 86    | 140 | 1130.2221 | 6775.2889 | 6775.2737 | 2.24 | 1  | 59    | 1.8E-06 | R.EQLGPVTQEFWDNLEKETEGLRQEMSKDLEEVKAKVQPYLDDFQKKWQEEEMELR.Q + Oxidation (M)   |
| 86    | 140 | 1130.2218 | 6775.2871 | 6775.2737 | 1.98 | 1  | 58    | 2.5E-06 | R.EQLGPVTQEFWDNLEKETEGLRQEMSKDLEEVKAKVQPYLDDFQKKWQEEEMELR.Q + Oxidation (M)   |
| 86    | 140 | 1130.2242 | 6775.3015 | 6775.2737 | 4.1  | 1  | 57    | 3E-06   | R.EQLGPVTQEFWDNLEKETEGLRQEMSKDLEEVKAKVQPYLDDFQKKWQEEEMELR.Q + Oxidation (M)   |
| 86    | 140 | 1132.8908 | 6791.3011 | 6791.2687 | 4.78 | 1  | 55    | 5.1E-06 | R.EQLGPVTQEFWDNLEKETEGLRQEMSKDLEEVKAKVQPYLDDFQKKWQEEEMELR.Q + 2 Oxidation (M) |
| 86    | 140 | 1130.2218 | 6775.2871 | 6775.2737 | 1.98 | 1  | 53    | 8.1E-06 | R.EQLGPVTQEFWDNLEKETEGLRQEMSKDLEEVKAKVQPYLDDFQKKWQEEEMELR.Q + Oxidation (M)   |
| 240   | 267 | 1061.5859 | 3181.7359 | 3181.7274 | 2.65 | 0  | 53    | 5.6E-06 | R.QGLLPVLESFKVSFLSALEEYTKKLNLTQ.                                              |
| 86    | 140 | 1130.2217 | 6775.2865 | 6775.2737 | 1.89 | 1  | 52    | 8.6E-06 | R.EQLGPVTQEFWDNLEKETEGLRQEMSKDLEEVKAKVQPYLDDFQKKWQEEEMELR.Q + Oxidation (M)   |
| 240   | 267 | 792.1841  | 3164.7074 | 3164.7009 | 2.06 | 0  | 49    | 1.3E-05 | R.QGLLPVLESFKVSFLSALEEYTKKLNLTQ.- + Gln->pyro-Glu (N-term Q)                  |
| 86    | 140 | 1130.2217 | 6775.2865 | 6775.2737 | 1.89 | 1  | 44    | 6.3E-05 | R.EQLGPVTQEFWDNLEKETEGLRQEMSKDLEEVKAKVQPYLDDFQKKWQEEEMELR.Q + Oxidation (M)   |
| 35    | 51  | 626.6829  | 1877.0268 | 1877.0258 | 0.49 | 0  | 40    | 0.00015 | R.VKDLATVYVDVLDKDSGR.D                                                        |
| 86    | 140 | 1356.0686 | 6775.3066 | 6775.2737 | 4.85 | 1  | 40    | 0.00015 | R.EQLGPVTQEFWDNLEKETEGLRQEMSKDLEEVKAKVQPYLDDFQKKWQEEEMELR.Q + Oxidation (M)   |
| 86    | 140 | 1127.5562 | 6759.2935 | 6759.2788 | 2.18 | 1  | 38    | 0.00021 | R.EQLGPVTQEFWDNLEKETEGLRQEMSKDLEEVKAKVQPYLDDFQKKWQEEEMELR.Q                   |
| 86    | 140 | 1127.5558 | 6759.2911 | 6759.2788 | 1.82 | 1  | 37    | 0.00023 | R.EQLGPVTQEFWDNLEKETEGLRQEMSKDLEEVKAKVQPYLDDFQKKWQEEEMELR.Q                   |
| 86    | 140 | 971.1903  | 6791.2812 | 6791.2687 | 1.85 | 1  | 36    | 0.00034 | R.EQLGPVTQEFWDNLEKETEGLRQEMSKDLEEVKAKVQPYLDDFQKKWQEEEMELR.Q + 2 Oxidation (M) |
| 240   | 267 | 1055.9098 | 3164.7076 | 3164.7009 | 2.11 | 0  | 36    | 0.00028 | R.QGLLPVLESFKVSFLSALEEYTKKLNLTQ.- + Gln->pyro-Glu (N-term Q)                  |
| 240   | 267 | 1055.9099 | 3164.7079 | 3164.7009 | 2.2  | 0  | 32    | 0.00065 | R.QGLLPVLESFKVSFLSALEEYTKKLNLTQ.- + Gln->pyro-Glu (N-term Q)                  |
| 86    | 140 | 1356.0648 | 6775.2876 | 6775.2737 | 2.05 | 1  | 30    | 0.0014  | R.EQLGPVTQEFWDNLEKETEGLRQEMSKDLEEVKAKVQPYLDDFQKKWQEEEMELR.Q + Oxidation (M)   |
| 86    | 140 | 1127.5559 | 6759.2917 | 6759.2788 | 1.91 | 1  | 28    | 0.0018  | R.EQLGPVTQEFWDNLEKETEGLRQEMSKDLEEVKAKVQPYLDDFQKKWQEEEMELR.Q                   |
| 240   | 267 | 792.1839  | 3164.7066 | 3164.7009 | 1.81 | 0  | 26    | 0.0027  | R.QGLLPVLESFKVSFLSALEEYTKKLNLTQ.- + Gln->pyro-Glu (N-term Q)                  |
| 86    | 140 | 1130.2208 | 6775.2811 | 6775.2737 | 1.09 | 1  | 23    | 0.0072  | R.EQLGPVTQEFWDNLEKETEGLRQEMSKDLEEVKAKVQPYLDDFQKKWQEEEMELR.Q + Oxidation (M)   |
| 86    | 140 | 1356.0638 | 6775.2826 | 6775.2737 | 1.31 | 1  | 23    | 0.0084  | R.EQLGPVTQEFWDNLEKETEGLRQEMSKDLEEVKAKVQPYLDDFQKKWQEEEMELR.Q + Oxidation (M)   |
| 86    | 140 | 1127.5556 | 6759.2899 | 6759.2788 | 1.65 | 1  | 22    | 0.0083  | R.EQLGPVTQEFWDNLEKETEGLRQEMSKDLEEVKAKVQPYLDDFQKKWQEEEMELR.Q                   |
| 86    | 140 | 1130.2217 | 6775.2865 | 6775.2737 | 1.89 | 1  | 22    | 0.01    | R.EQLGPVTQEFWDNLEKETEGLRQEMSKDLEEVKAKVQPYLDDFQKKWQEEEMELR.Q + Oxidation (M)   |
| 86    | 140 | 971.1909  | 6791.2854 | 6791.2687 | 2.47 | 1  | 22    | 0.0073  | R.EQLGPVTQEFWDNLEKETEGLRQEMSKDLEEVKAKVQPYLDDFQKKWQEEEMELR.Q + 2 Oxidation (M) |
| 86    | 140 | 1132.8877 | 6791.2825 | 6791.2687 | 2.04 | 1  | 21    | 0.009   | R.EQLGPVTQEFWDNLEKETEGLRQEMSKDLEEVKAKVQPYLDDFQKKWQEEEMELR.Q + 2 Oxidation (M) |
| 240   | 267 | 792.1843  | 3164.7080 | 3164.7009 | 2.25 | 0  | 21    | 0.0072  | R.QGLLPVLESFKVSFLSALEEYTKKLNLTQ.- + Gln->pyro-Glu (N-term Q)                  |
| 86    | 140 | 1127.5565 | 6759.2953 | 6759.2788 | 2.44 | 1  | 20    | 0.013   | R.EQLGPVTQEFWDNLEKETEGLRQEMSKDLEEVKAKVQPYLDDFQKKWQEEEMELR.Q                   |
| 86    | 140 | 1130.2218 | 6775.2871 | 6775.2737 | 1.98 | 1  | 19    | 0.02    | R.EQLGPVTQEFWDNLEKETEGLRQEMSKDLEEVKAKVQPYLDDFQKKWQEEEMELR.Q + Oxidation (M)   |
| 86    | 140 | 1130.2220 | 6775.2883 | 6775.2737 | 2.16 | 1  | 18    | 0.024   | R.EQLGPVTQEFWDNLEKETEGLRQEMSKDLEEVKAKVQPYLDDFQKKWQEEEMELR.Q + Oxidation (M)   |
| 86    | 140 | 1356.0651 | 6775.2891 | 6775.2737 | 2.27 | 1  | 18    | 0.023   | R.EQLGPVTQEFWDNLEKETEGLRQEMSKDLEEVKAKVQPYLDDFQKKWQEEEMELR.Q + Oxidation (M)   |
| 86    | 140 | 971.1896  | 6791.2760 | 6791.2687 | 1.08 | 1  | 18    | 0.022   | R.EQLGPVTQEFWDNLEKETEGLRQEMSKDLEEVKAKVQPYLDDFQKKWQEEEMELR.Q + 2 Oxidation (M) |
| 86    | 140 | 849.9198  | 6791.3002 | 6791.2687 | 4.64 | 1  | 18    | 0.023   | R.EQLGPVTQEFWDNLEKETEGLRQEMSKDLEEVKAKVQPYLDDFQKKWQEEEMELR.Q + 2 Oxidation (M) |
| 86    | 140 | 752.0398  | 6759.2928 | 6759.2788 | 2.07 | 1  | 16    | 0.03    | R.EQLGPVTQEFWDNLEKETEGLRQEMSKDLEEVKAKVQPYLDDFQKKWQEEEMELR.Q                   |
| 86    | 140 | 849.9175  | 6791.2820 | 6791.2687 | 1.97 | 1  | 15    | 0.036   | R.EQLGPVTQEFWDNLEKETEGLRQEMSKDLEEVKAKVQPYLDDFQKKWQEEEMELR.Q + 2 Oxidation (M) |
| 240   | 267 | 1055.9110 | 3164.7112 | 3164.7009 | 3.25 | 0  | 15    | 0.033   | R.QGLLPVLESFKVSFLSALEEYTKKLNLTQ.- + Gln->pyro-Glu (N-term Q)                  |
| 240   | 267 | 1061.5855 | 3181.7347 | 3181.7274 | 2.28 | 0  | 15    | 0.037   | R.QGLLPVLESFKVSFLSALEEYTKKLNLTQ.-                                             |
| 86    | 140 | 752.0392  | 6759.2877 | 6759.2788 | 1.31 | 1  | 14    | 0.06    | R.EQLGPVTQEFWDNLEKETEGLRQEMSKDLEEVKAKVQPYLDDFQKKWQEEEMELR.Q                   |
| 86    | 140 | 752.0395  | 6759.2904 | 6759.2788 | 1.71 | 1  | 14    | 0.055   | R.EQLGPVTQEFWDNLEKETEGLRQEMSKDLEEVKAKVQPYLDDFQKKWQEEEMELR.Q                   |
| 86    | 140 | 1130.2236 | 6775.2979 | 6775.2737 | 3.57 | 1  | 14    | 0.067   | R.EQLGPVTQEFWDNLEKETEGLRQEMSKDLEEVKAKVQPYLDDFQKKWQEEEMELR.Q + Oxidation (M)   |

Score > 14 indicates identity; MC: missed cleavages

**Figure S4. ApoA-I epitope identification using digestion at arginine (R) residues.**

**A.** Full chromatogram of each immunoreactive fraction by nano liquid chromatography system.

**B.** MS/MS spectra of peptides from the fraction 74: QGLLPVLESFKVSFLSALEEYTKKLNTQ; m/z 796.94 (4+); RT: 79.42 min.

**C.** MS/MS spectra of peptides from the fraction 74: Pyro-QGLLPVLESFKVSFLSALEEYTKKLNTQ; m/z 1056.24 (3+); RT: 79.33 min.

**D.** Representative mass spectra of peptides (at RT:61.70) present in the immunoreactive fraction 80 by mass spectrometry (LTQ/Orbitrap).

**E.** MS/MS spectra of peptides from the fraction 80: QGLLPVLESFKVSFLSALEEYTKKLNTQ; m/z 796.69 (4+); RT: 61.76 min.

**F.** Representative mass spectra of peptides (at RT:70.65) present in the immunoreactive fraction 80 by mass spectrometry (LTQ/Orbitrap).

**G.** MS/MS spectra of peptides from the fraction 80: Pyro-QGLLPVLESFKVSFLSALEEYTKKLNTQ; m/z 1056.24 (3+); RT:70.57 min.

**H-K.** Extracted ion chromatograms, using the first C13 isotope, for the peptides: aa240-267: Pyro-QGLLPVLESFKVSFLSALEEYTKKLNTQ ( $[M+4H]^{4+}$  792.44 and  $[M+3H]^{3+}$  1056.24) and aa240-267: QGLLPVLESFKVSFLSALEEYTKKLNTQ ( $[M+4H]^{4+}$  796.94 and  $[M+3H]^{3+}$  1061.91).

**L.** ApoAI peptides identified in the fraction 80 using the Mascot Distiller tool.

**Figure S5. Immunoreactivity compared to the extract ion chromatogram intensity in peptide fractions derived from ApoA-I digested at arginine residues.**

The HPLC-fractions with higher presence of these peptides are 74 and 80, as observed in the maximum extracted ion chromatogram (first C13 isotope). In the fraction 80, the two variants eluted in different retention times, the natural variant eluted at RT=61.70min (also in Figure S4D and E), while the pyroglutamic variant eluted at RT=70.65min (also in Figure S4F and G), the same did not happen for the other HPLC fractions, both peptides eluted at the same retention time (Figure 5F and S4B and C). Other peptides derived from miscleavages of ApoA-I were also identified in the fraction 80 (Figure S4L in Supporting information). Therefore, Figure S5 indicates that the level of maximum extracted ion chromatogram intensity for the peptide from the C-terminal helix, independently of the charge state, corresponds to the level of immunoreactivity observed in each one of the HPLC-fractions using samples from patients containing high-titer of autoantibodies against ApoA-I.

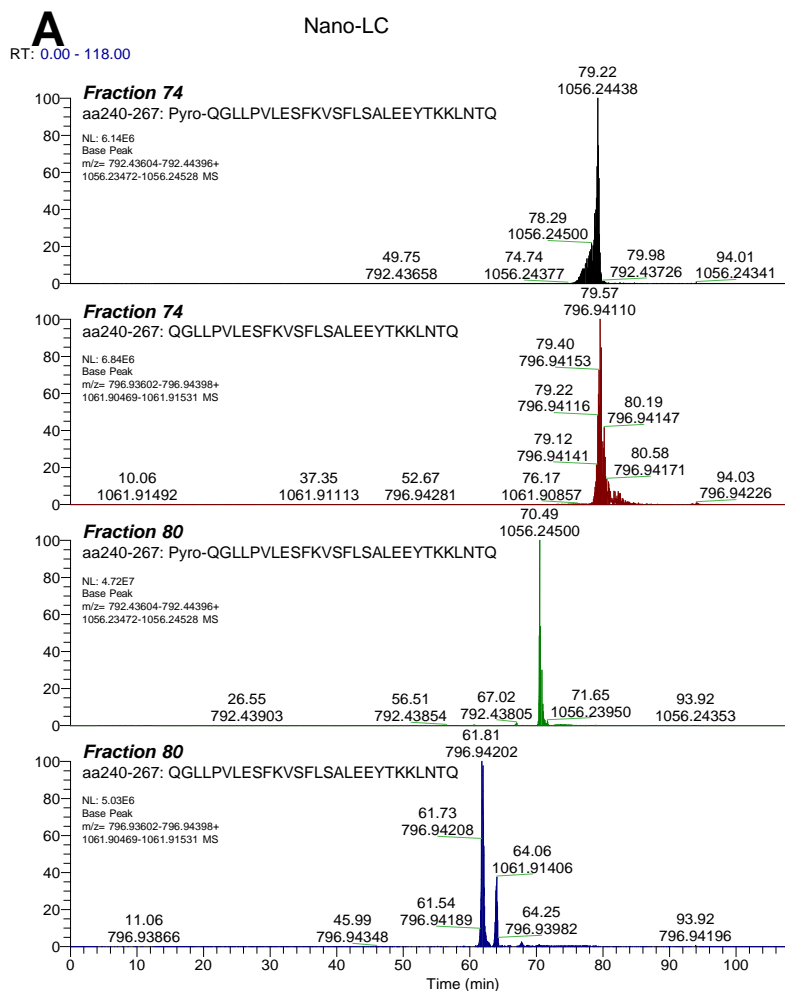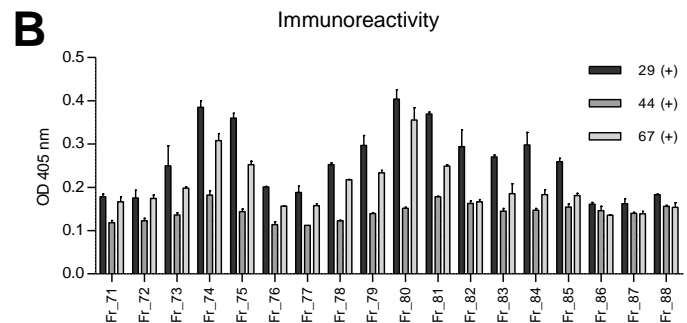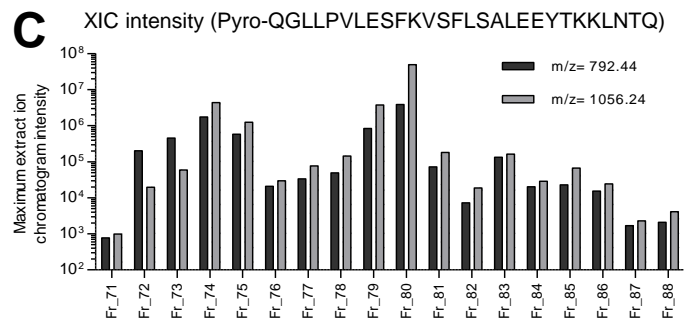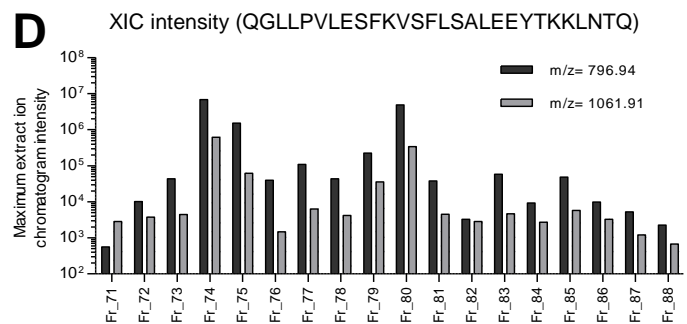

**Figure S5. Immunoreactivity compared to the extract ion chromatogram intensity in peptide fractions derived from ApoA-I digested at arginine residues.** (A) Extracted ion chromatogram of the fraction 74 and 80, using the first C13 isotope, for both peptide C and its pyro-Glu variant. (B) Comparison between intensity of the immunoreactivity (OD at 405 nm, arbitrary unit) and maximum extracted ion chromatogram for the peptide C and its pyro-Glu variant in each HPLC fraction.
